# Supplementary material for: Consumption of antimicrobial manuka honey does not significantly perturb the microbiota in the hind gut of mice
Source: PeerJ. 2016 Dec 20;4:e2787. doi: 10.7717/peerj.2787 (PMC5178337; doi:10.7717/peerj.2787)
Supplement: Data S1 [file peerj-04-2787-s001.xlsx]

## Sheet: Data
Experiment	Samples	Mouse	Diet	MeanCp	STD Cp	Mean conc	STD conc	CN in 200 uL undiluted	mg tissue	Copy number/gram
Experiment: Doug's repeat - plate 1 BIF Erika 2.9.8 Active filter: SYBR Green I / HRM Dye (483-533)	A1, A2, A3	37	1	25.0329	0.195882	1.47255e+06	124298	5.89022e+08	155	3.80014e+09
Experiment: Doug's repeat - plate 1 BIF Erika 2.9.8 Active filter: SYBR Green I / HRM Dye (483-533)	D4, D5, D6	40	1	24.5982	0.0131442	1.77486e+06	10139.4	7.09946e+08	139	5.10753e+09
Experiment: Doug's repeat - plate 1 BIF Erika 2.9.8 Active filter: SYBR Green I / HRM Dye (483-533)	A7, A8, A9	33	1	24.1533	0.0520678	2.15423e+06	48588.9	8.6169e+08	82	1.05084e+10
Experiment: Doug's repeat - plate 1 BIF Erika 2.9.8 Active filter: SYBR Green I / HRM Dye (483-533)	B7, B8, B9	28	1	24.0753	0.0858574	2.22924e+06	82393.7	8.91697e+08	72	1.23847e+10
Experiment: Doug's repeat - plate 1 BIF Erika 2.9.8 Active filter: SYBR Green I / HRM Dye (483-533)	E4, E5, E6	25	1	23.9393	0.0447274	2.36433e+06	46034.8	9.45732e+08	76	1.24438e+10
Experiment: Doug's repeat - plate 1 BIF Erika 2.9.8 Active filter: SYBR Green I / HRM Dye (483-533)	E10, E11, E12	29	1	23.0216	0.032121	3.52436e+06	49202.4	1.40974e+09	105	1.34261e+10
Experiment: Doug's repeat - plate 1 BIF Erika 2.9.8 Active filter: SYBR Green I / HRM Dye (483-533)	C1, C2, C3	24	1	22.1833	0.029539	5.07527e+06	65261.6	2.03011e+09	125	1.62409e+10
Experiment: Doug's repeat - plate 1 BIF Erika 2.9.8 Active filter: SYBR Green I / HRM Dye (483-533)	D10, D11, D12	6	1	21.6267	0.0313462	6.46591e+06	87989.6	2.58636e+09	148	1.74754e+10
Experiment: Doug's repeat - plate 1 BIF Erika 2.9.8 Active filter: SYBR Green I / HRM Dye (483-533)	B1, B2, B3	21	1	22.0003	0.105937	5.49943e+06	254085	2.19977e+09	110	1.99979e+10
Experiment: Doug's repeat - plate 1 BIF Erika 2.9.8 Active filter: SYBR Green I / HRM Dye (483-533)	F4, F5, F6	36	1	22.6773	0.043825	4.0941e+06	78291.2	1.63764e+09	78	2.09954e+10
Experiment: Doug's repeat - plate 1 BIF Erika 2.9.8 Active filter: SYBR Green I / HRM Dye (483-533)	C7, C8, C9	27	1	21.2168	0.0274269	7.72828e+06	92343.4	3.09131e+09	66	4.68381e+10
Experiment: Doug's repeat - plate 1 BIF Erika 2.9.8 Active filter: SYBR Green I / HRM Dye (483-533)	D7, D8, D9	30	2	26.0801	0.0326335	931490	13262.7	3.72596e+08	120	3.10497e+09
Experiment: Doug's repeat - plate 1 BIF Erika 2.9.8 Active filter: SYBR Green I / HRM Dye (483-533)	D1, D2, D3	31	2	25.4704	0.0483594	1.21458e+06	25559.3	4.85832e+08	113	4.2994e+09
Experiment: Doug's repeat - plate 1 BIF Erika 2.9.8 Active filter: SYBR Green I / HRM Dye (483-533)	E7, E8, E9	10	2	24.3354	0.129764	1.99188e+06	110970	7.96753e+08	134	5.94592e+09
Experiment: Doug's repeat - plate 1 BIF Erika 2.9.8 Active filter: SYBR Green I / HRM Dye (483-533)	F1, F2, F3	38	2	25.3277	0.129714	1.2935e+06	72512.8	5.17401e+08	80	6.46751e+09
Experiment: Doug's repeat - plate 1 BIF Erika 2.9.8 Active filter: SYBR Green I / HRM Dye (483-533)	C4, C5, C6	1	2	25.1104	0.0497002	1.42053e+06	30740.2	5.68213e+08	75	7.57617e+09
Experiment: Doug's repeat - plate 1 BIF Erika 2.9.8 Active filter: SYBR Green I / HRM Dye (483-533)	A4, A5, A6	22	2	23.9813	0.0120518	2.32127e+06	12157.4	9.28509e+08	113	8.2169e+09
Experiment: Doug's repeat - plate 1 BIF Erika 2.9.8 Active filter: SYBR Green I / HRM Dye (483-533)	B4, B5, B6	11	2	24.2602	0.0524146	2.05632e+06	46743.5	8.22527e+08	96	8.56799e+09
Experiment: Doug's repeat - plate 1 BIF Erika 2.9.8 Active filter: SYBR Green I / HRM Dye (483-533)	F7, F8, F9	23	2	23.4549	0.0108637	2.91863e+06	13792.9	1.16745e+09	134	8.71232e+09
Experiment: Doug's repeat - plate 1 BIF Erika 2.9.8 Active filter: SYBR Green I / HRM Dye (483-533)	A10, A11, A12	26	2	23.1704	0.0299658	3.30337e+06	43226.7	1.32135e+09	141	9.37125e+09
Experiment: Doug's repeat - plate 1 BIF Erika 2.9.8 Active filter: SYBR Green I / HRM Dye (483-533)	E1, E2, E3	18	2	24.0196	0.0326501	2.28296e+06	32338.4	9.13184e+08	86	1.06184e+10
Experiment: Doug's repeat - plate 1 BIF Erika 2.9.8 Active filter: SYBR Green I / HRM Dye (483-533)	B10, B11, B12	17	2	21.8211	0.0475832	5.94209e+06	122351	2.37684e+09	107	2.22134e+10
Experiment: Doug's repeat - plate 1 LACTO Erika 2.9.8 Active filter: SYBR Green I / HRM Dye (483-533)	C4, C5, C6	1	2	24.5308	0.00386731	1.49408e+06	2696.36	5.9763e+08	75	7.9684e+09
Experiment: Doug's repeat - plate 2 LACTO Tafa 2.9.8 Active filter: SYBR Green I / HRM Dye (483-533)	E4, E5, E6	2	1	24.0008	0.0287072	1.56443e+06	21465.7	6.25773e+08	76	8.23386e+09
Experiment: Doug's repeat - plate 2 LACTO Tafa 2.9.8 Active filter: SYBR Green I / HRM Dye (483-533)	A4, A5, A6	3	2	23.7523	0.0115169	1.76236e+06	9743.95	7.04942e+08	86	8.197e+09
Experiment: Doug's repeat - plate 2 LACTO Tafa 2.9.8 Active filter: SYBR Green I / HRM Dye (483-533)	E10, E11, E12	4	1	25.9291	0.094297	620789	28253.6	2.48316e+08	97	2.55995e+09
Experiment: Doug's repeat - plate 2 LACTO Tafa 2.9.8 Active filter: SYBR Green I / HRM Dye (483-533)	F4, F5, F6	5	1	23.1999	0.0594653	2.29762e+06	65448.3	9.19048e+08	118	7.78854e+09
Experiment: Doug's repeat - plate 1 LACTO Erika 2.9.8 Active filter: SYBR Green I / HRM Dye (483-533)	D10, D11, D12	6	1	22.4024	0.213825	4.04634e+06	412151	1.61854e+09	148	1.09361e+10
Experiment: Doug's repeat - plate 2 LACTO Tafa 2.9.8 Active filter: SYBR Green I / HRM Dye (483-533)	D7, D8, D9	7	2	22.7457	0.0304281	2.85623e+06	41817.4	1.14249e+09	133	8.59017e+09
Experiment: Doug's repeat - plate 2 LACTO Tafa 2.9.8 Active filter: SYBR Green I / HRM Dye (483-533)	C4, C5, C6	8	2	25.615	0.0529309	721400	18439.8	2.8856e+08	130	2.21969e+09
Experiment: Doug's repeat - plate 2 LACTO Tafa 2.9.8 Active filter: SYBR Green I / HRM Dye (483-533)	A1, A2, A3	9	1	30.0182	0.243543	86681.7	11259.3	3.46727e+07	114	3.04146e+08
Experiment: Doug's repeat - plate 1 LACTO Erika 2.9.8 Active filter: SYBR Green I / HRM Dye (483-533)	E7, E8, E9	10	2	24.7631	0.00544724	1.3406e+06	3409.21	5.36241e+08	134	4.0018e+09
Experiment: Doug's repeat - plate 1 LACTO Erika 2.9.8 Active filter: SYBR Green I / HRM Dye (483-533)	B4, B5, B6	11	2	25.0345	0.0688406	1.18162e+06	38177.9	4.72646e+08	96	4.9234e+09
Experiment: Doug's repeat - plate 2 LACTO Tafa 2.9.8 Active filter: SYBR Green I / HRM Dye (483-533)	F1, F2, F3	12	2	24.7198	0.03207	1.10809e+06	16984.9	4.43235e+08	151	2.93533e+09
Experiment: Doug's repeat - plate 2 LACTO Tafa 2.9.8 Active filter: SYBR Green I / HRM Dye (483-533)	E1, E2, E3	13	2	22.963	0.0462057	2.57376e+06	57379.3	1.02951e+09	128	8.04301e+09
Experiment: Doug's repeat - plate 2 LACTO Tafa 2.9.8 Active filter: SYBR Green I / HRM Dye (483-533)	D1, D2, D3	14	2	26.9939	0.0660711	372390	11755	1.48956e+08	148	1.00646e+09
Experiment: Doug's repeat - plate 2 LACTO Tafa 2.9.8 Active filter: SYBR Green I / HRM Dye (483-533)	A7, A8, A9	15	1	22.8162	0.0501205	2.76165e+06	66458.5	1.10466e+09	151	7.31562e+09
Experiment: Doug's repeat - plate 2 LACTO Tafa 2.9.8 Active filter: SYBR Green I / HRM Dye (483-533)	C1, C2, C3	16	1	24.2609	0.0267922	1.3809e+06	17688.6	5.52359e+08	184	3.00195e+09
Experiment: Doug's repeat - plate 1 LACTO Erika 2.9.8 Active filter: SYBR Green I / HRM Dye (483-533)	B10, B11, B12	17	2	21.6279	0.0351416	5.78838e+06	94500.3	2.31535e+09	107	2.16388e+10
Experiment: Doug's repeat - plate 1 LACTO Erika 2.9.8 Active filter: SYBR Green I / HRM Dye (483-533)	E1, E2, E3	18	2	22.5872	0.0335806	3.69986e+06	57758.4	1.47994e+09	86	1.72087e+10
Experiment: Doug's repeat - plate 2 LACTO Tafa 2.9.8 Active filter: SYBR Green I / HRM Dye (483-533)	D4, D5, D6	19	1	27.488	0.0464299	293756	6509.13	1.17502e+08	118	9.95782e+08
Experiment: Doug's repeat - plate 2 LACTO Tafa 2.9.8 Active filter: SYBR Green I / HRM Dye (483-533)	E7, E8, E9	20	2	26.1702	0.100047	553036	26160.7	2.21214e+08	101	2.19024e+09
Experiment: Doug's repeat - plate 1 LACTO Erika 2.9.8 Active filter: SYBR Green I / HRM Dye (483-533)	B1, B2, B3	21	1	21.7484	0.068864	5.47342e+06	175863	2.18937e+09	110	1.99033e+10
Experiment: Doug's repeat - plate 1 LACTO Erika 2.9.8 Active filter: SYBR Green I / HRM Dye (483-533)	A4, A5, A6	22	2	23.9232	0.0582031	1.98416e+06	54000.5	7.93663e+08	113	7.02357e+09
Experiment: Doug's repeat - plate 2 BIF Erika 2.9.8 Active filter: SYBR Green I / HRM Dye (483-533)	A1, A2, A3	9	1	32.6639	0.494511	43452.2	11022.7	1.73809e+07	114	1.52464e+08
Experiment: Doug's repeat - plate 2 BIF Erika 2.9.8 Active filter: SYBR Green I / HRM Dye (483-533)	D4, D5, D6	19	1	32.0419	0.026335	59558.8	819.019	2.38235e+07	118	2.01894e+08
Experiment: Doug's repeat - plate 2 BIF Erika 2.9.8 Active filter: SYBR Green I / HRM Dye (483-533)	A7, A8, A9	15	1	31.0554	0.431803	97970.9	19154.2	3.91884e+07	151	2.59526e+08
Experiment: Doug's repeat - plate 2 BIF Erika 2.9.8 Active filter: SYBR Green I / HRM Dye (483-533)	D10, D11, D12	41	1	31.7155	0.0820237	70433.4	2881.74	2.81734e+07	100	2.81734e+08
Experiment: Doug's repeat - plate 2 BIF Erika 2.9.8 Active filter: SYBR Green I / HRM Dye (483-533)	B1, B2, B3	34	1	31.9279	0.106962	63232.7	3439.48	2.52931e+07	89	2.84192e+08
Experiment: Doug's repeat - plate 2 BIF Erika 2.9.8 Active filter: SYBR Green I / HRM Dye (483-533)	E4, E5, E6	2	1	30.2342	0.128592	140081	7947.46	5.60324e+07	76	7.37268e+08
Experiment: Doug's repeat - plate 2 BIF Erika 2.9.8 Active filter: SYBR Green I / HRM Dye (483-533)	B7, B8, B9	35	1	27.9626	0.165939	376192	27494.8	1.50477e+08	151	9.96534e+08
Experiment: Doug's repeat - plate 2 BIF Erika 2.9.8 Active filter: SYBR Green I / HRM Dye (483-533)	C1, C2, C3	16	1	25.1061	0.0103719	1.29943e+06	5863.35	5.19774e+08	184	2.82486e+09
Experiment: Doug's repeat - plate 2 BIF Erika 2.9.8 Active filter: SYBR Green I / HRM Dye (483-533)	E10, E11, E12	4	1	26.5054	0.0144266	707386	4440.82	2.82955e+08	97	2.91706e+09
Experiment: Doug's repeat - plate 2 BIF Erika 2.9.8 Active filter: SYBR Green I / HRM Dye (483-533)	F4, F5, F6	5	1	24.8745	0.0568162	1.4373e+06	35280	5.74922e+08	118	4.87222e+09
Experiment: Doug's repeat - plate 2 BIF Erika 2.9.8 Active filter: SYBR Green I / HRM Dye (483-533)	D1, D2, D3	14	2	30.0621	0.116158	150932	7651.16	6.03728e+07	148	4.07925e+08
Experiment: Doug's repeat - plate 2 BIF Erika 2.9.8 Active filter: SYBR Green I / HRM Dye (483-533)	A10, A11, A12	42	2	31.4143	0.28561	82132.9	11276.4	3.28532e+07	79	4.15863e+08
Experiment: Doug's repeat - plate 2 BIF Erika 2.9.8 Active filter: SYBR Green I / HRM Dye (483-533)	A4, A5, A6	3	2	30.7744	0.254326	110719	12862.8	4.42875e+07	86	5.1497e+08
Experiment: Doug's repeat - plate 2 BIF Erika 2.9.8 Active filter: SYBR Green I / HRM Dye (483-533)	E7, E8, E9	20	2	30.0533	0.121204	151524	8096.37	6.06095e+07	101	6.00094e+08
Experiment: Doug's repeat - plate 2 BIF Erika 2.9.8 Active filter: SYBR Green I / HRM Dye (483-533)	B4, B5, B6	39	2	27.7453	0.103908	412994	18698.7	1.65198e+08	152	1.08683e+09
Experiment: Doug's repeat - plate 2 BIF Erika 2.9.8 Active filter: SYBR Green I / HRM Dye (483-533)	B10, B11, B12	32	2	28.0991	0.0813884	354048	12581.5	1.41619e+08	77	1.83921e+09
Experiment: Doug's repeat - plate 2 BIF Erika 2.9.8 Active filter: SYBR Green I / HRM Dye (483-533)	C4, C5, C6	8	2	26.7071	0.0541421	648157	15346.2	2.59263e+08	130	1.99433e+09
Experiment: Doug's repeat - plate 2 BIF Erika 2.9.8 Active filter: SYBR Green I / HRM Dye (483-533)	E1, E2, E3	13	2	26.5359	0.018482	698090	5619.67	2.79236e+08	128	2.18153e+09
Experiment: Doug's repeat - plate 2 BIF Erika 2.9.8 Active filter: SYBR Green I / HRM Dye (483-533)	F1, F2, F3	12	2	25.1176	0.0501309	1.29314e+06	28127.5	5.17254e+08	151	3.42552e+09
Experiment: Doug's repeat - plate 2 BIF Erika 2.9.8 Active filter: SYBR Green I / HRM Dye (483-533)	D7, D8, D9	7	2	24.5168	0.0867975	1.67945e+06	63743.1	6.7178e+08	133	5.05098e+09
Experiment: Doug's repeat - plate 1 LACTO Erika 2.9.8 Active filter: SYBR Green I / HRM Dye (483-533)	F7, F8, F9	23	2	24.5167	0.115319	1.50537e+06	80301.9	6.02146e+08	134	4.49363e+09
Experiment: Doug's repeat - plate 1 LACTO Erika 2.9.8 Active filter: SYBR Green I / HRM Dye (483-533)	C1, C2, C3	24	1	22.6118	0.0578914	3.65836e+06	98681.6	1.46334e+09	125	1.17068e+10
Experiment: Doug's repeat - plate 1 LACTO Erika 2.9.8 Active filter: SYBR Green I / HRM Dye (483-533)	E4, E5, E6	25	1	21.8758	0.0812402	5.1581e+06	195428	2.06324e+09	76	2.71479e+10
Experiment: Doug's repeat - plate 1 LACTO Erika 2.9.8 Active filter: SYBR Green I / HRM Dye (483-533)	A10, A11, A12	26	2	23.3569	0.166056	2.58856e+06	196148	1.03542e+09	141	7.34344e+09
Experiment: Doug's repeat - plate 1 LACTO Erika 2.9.8 Active filter: SYBR Green I / HRM Dye (483-533)	C7, C8, C9	27	1	23.6694	0.0621243	2.23365e+06	65219.3	8.93459e+08	66	1.35373e+10
Experiment: Doug's repeat - plate 1 LACTO Erika 2.9.8 Active filter: SYBR Green I / HRM Dye (483-533)	B7, B8, B9	28	1	24.1957	0.0316064	1.74705e+06	25803.6	6.9882e+08	72	9.70583e+09
Experiment: Doug's repeat - plate 1 LACTO Erika 2.9.8 Active filter: SYBR Green I / HRM Dye (483-533)	E10, E11, E12	29	1	22.5668	0.0983931	3.73756e+06	171144	1.49502e+09	105	1.42383e+10
Experiment: Doug's repeat - plate 1 LACTO Erika 2.9.8 Active filter: SYBR Green I / HRM Dye (483-533)	D7, D8, D9	30	2	23.9718	0.157566	1.94277e+06	145246	7.77107e+08	120	6.47589e+09
Experiment: Doug's repeat - plate 1 LACTO Erika 2.9.8 Active filter: SYBR Green I / HRM Dye (483-533)	D1, D2, D3	31	2	24.3471	0.129124	1.62972e+06	99817	6.51889e+08	113	5.76893e+09
Experiment: Doug's repeat - plate 2 LACTO Tafa 2.9.8 Active filter: SYBR Green I / HRM Dye (483-533)	B10, B11, B12	32	2	23.8844	0.0428545	1.65433e+06	33803.3	6.61731e+08	77	8.59391e+09
Experiment: Doug's repeat - plate 1 LACTO Erika 2.9.8 Active filter: SYBR Green I / HRM Dye (483-533)	A7, A8, A9	33	1	23.5297	0.0151283	2.38351e+06	16846.5	9.53404e+08	82	1.16269e+10
Experiment: Doug's repeat - plate 2 LACTO Tafa 2.9.8 Active filter: SYBR Green I / HRM Dye (483-533)	B1, B2, B3	34	1	23.2529	0.090777	2.2407e+06	98647	8.96281e+08	89	1.00706e+10
Experiment: Doug's repeat - plate 2 LACTO Tafa 2.9.8 Active filter: SYBR Green I / HRM Dye (483-533)	B7, B8, B9	35	1	22.5198	0.0401215	3.18321e+06	60982.1	1.27329e+09	151	8.43235e+09
Experiment: Doug's repeat - plate 1 LACTO Erika 2.9.8 Active filter: SYBR Green I / HRM Dye (483-533)	F4, F5, F6	36	1	23.8234	0.0398132	2.07848e+06	38573.5	8.31393e+08	78	1.06589e+10
Experiment: Doug's repeat - plate 1 LACTO Erika 2.9.8 Active filter: SYBR Green I / HRM Dye (483-533)	A1, A2, A3	37	1	23.7189	0.0845599	2.1832e+06	86068.9	8.73278e+08	155	5.63405e+09
Experiment: Doug's repeat - plate 1 LACTO Erika 2.9.8 Active filter: SYBR Green I / HRM Dye (483-533)	F1, F2, F3	38	2	25.857	0.0116859	804778	4384.43	3.21911e+08	80	4.02389e+09
Experiment: Doug's repeat - plate 2 LACTO Tafa 2.9.8 Active filter: SYBR Green I / HRM Dye (483-533)	B4, B5, B6	39	2	22.0865	0.0149414	3.91823e+06	28082.1	1.56729e+09	152	1.03111e+10
Experiment: Doug's repeat - plate 1 LACTO Erika 2.9.8 Active filter: SYBR Green I / HRM Dye (483-533)	D4, D5, D6	40	1	24.0052	0.0524063	1.90966e+06	46357.7	7.63864e+08	139	5.49543e+09
Experiment: Doug's repeat - plate 2 LACTO Tafa 2.9.8 Active filter: SYBR Green I / HRM Dye (483-533)	D10, D11, D12	41	1	24.4785	0.053932	1.24423e+06	32038.9	4.97693e+08	100	4.97693e+09
Experiment: Doug's repeat - plate 2 LACTO Tafa 2.9.8 Active filter: SYBR Green I / HRM Dye (483-533)	A10, A11, A12	42	2	23.8401	0.0217504	1.68967e+06	17664.8	6.75867e+08	79	8.55528e+09
Experiment: Doug's repeat - plate 3 (1st trial) BIF Tafa 3.9.8 Active filter: SYBR Green I / HRM Dye (483-533)	D7, D8, D9	7	2	25.6437	0.0137888	1.02642e+06	6123.32	4.10569e+08	96.5	4.2546e+09
Experiment: Doug's repeat - plate 3 (1st trial) BIF Tafa 3.9.8 Active filter: SYBR Green I / HRM Dye (483-533)	E10, E11, E12	8	2	23.014	0.0399109	3.19638e+06	54852.2	1.27855e+09	157	8.14364e+09
Experiment: Doug's repeat - plate 3 (1st trial) BIF Tafa 3.9.8 Active filter: SYBR Green I / HRM Dye (483-533)	A8, A9	9	2	30.5288	0.0439516	124449	2362.6	4.97797e+07	182.2	2.73215e+08
Experiment: Doug's repeat - plate 3 (1st trial) BIF Tafa 3.9.8 Active filter: SYBR Green I / HRM Dye (483-533)	C7, C8, C9	11	2	27.5081	0.116735	459147	22851.2	1.83659e+08	128.2	1.4326e+09
Experiment: Doug's repeat - plate 3 (1st trial) BIF Tafa 3.9.8 Active filter: SYBR Green I / HRM Dye (483-533)	C1, C2, C3	13	2	30.5656	0.117143	122575	6124.54	4.903e+07	120.2	4.07904e+08
Experiment: Doug's repeat - plate 3 (1st trial) BIF Tafa 3.9.8 Active filter: SYBR Green I / HRM Dye (483-533)	A4, A5, A6	15	2	33.5126	0.0223626	32969.5	337.335	1.31878e+07	109.2	1.20767e+08
Experiment: Doug's repeat - plate 3 (1st trial) BIF Tafa 3.9.8 Active filter: SYBR Green I / HRM Dye (483-533)	E4, E5, E6	34	2	25.806	0.0812726	957306	33380.7	3.82922e+08	117.1	3.27005e+09
Experiment: Doug's repeat - plate 3 (1st trial) BIF Tafa 3.9.8 Active filter: SYBR Green I / HRM Dye (483-533)	B10, B11, B12	35	2	27.6285	0.0890596	435732	16584.6	1.74293e+08	85.6	2.03613e+09
Experiment: Doug's repeat - plate 3 (1st trial) BIF Tafa 3.9.8 Active filter: SYBR Green I / HRM Dye (483-533)	D1, D2, D3	37	2	30.5515	0.102297	123300	5387.84	4.93199e+07	158.7	3.10774e+08
Experiment: Doug's repeat - plate 3 (1st trial) BIF Tafa 3.9.8 Active filter: SYBR Green I / HRM Dye (483-533)	A1, A2, A3	47	2	27.2266	0.179347	519105	39280.7	2.07642e+08	251.3	8.26272e+08
Experiment: Doug's repeat - plate 3 (1st trial) BIF Tafa 3.9.8 Active filter: SYBR Green I / HRM Dye (483-533)	D4, D5, D6	57	2	30.6491	0.0133393	118131	682.284	4.72526e+07	136.4	3.46427e+08
Experiment: Doug's repeat - plate 3 (1st trial) BIF Tafa 3.9.8 Active filter: SYBR Green I / HRM Dye (483-533)	C10, C11, C12	61	2	23.7964	0.105352	2.28112e+06	102410	9.12449e+08	138	6.61195e+09
Experiment: Doug's repeat - plate 3 (1st trial) BIF Tafa 3.9.8 Active filter: SYBR Green I / HRM Dye (483-533)	B4, B5, B6	63	2	28.5538	0.0485111	292073	6085.09	1.16829e+08	77.2	1.51333e+09
Experiment: Doug's repeat - plate 3 (1st trial) BIF Tafa 3.9.8 Active filter: SYBR Green I / HRM Dye (483-533)	B1, B2, B3	68	2	25.2793	0.217173	1.20486e+06	109828	4.81945e+08	220.8	2.18272e+09
Experiment: Doug's repeat - plate 3 (1st trial) BIF Tafa 3.9.8 Active filter: SYBR Green I / HRM Dye (483-533)	A10, A11, A12	80	2	26.5275	0.0887753	701037	26581.1	2.80415e+08	183.4	1.52898e+09
Experiment: Doug's repeat - plate 3 (1st trial) BIF Tafa 3.9.8 Active filter: SYBR Green I / HRM Dye (483-533)	E1, E2, E3	86	2	27.9578	0.117347	378094	19435.9	1.51238e+08	153.6	9.8462e+08
Experiment: Doug's repeat - plate 3 (1st trial) BIF Tafa 3.9.8 Active filter: SYBR Green I / HRM Dye (483-533)	E7, E9	111	2	31.1247	0.00530692	96048.6	222.832	3.84194e+07	105.5	3.64165e+08
Experiment: Doug's repeat - plate 3 (1st trial) BIF Tafa 3.9.8 Active filter: SYBR Green I / HRM Dye (483-533)	D10, D11, D12	115	2	26.9078	0.127799	595170	33359.9	2.38068e+08	125	1.90454e+09
Experiment: Doug's repeat - plate 3 (1st trial) BIF Tafa 3.9.8 Active filter: SYBR Green I / HRM Dye (483-533)	C4, C5, C6	116	2	24.5137	0.207933	1.67676e+06	152773	6.70704e+08	122	5.49758e+09
Experiment: Doug's repeat - plate 3 (1st trial) BIF Tafa 3.9.8 Active filter: SYBR Green I / HRM Dye (483-533)	B7, B8, B9	118	2	30.7695	0.270574	112607	12978.3	4.50428e+07	202.7	2.22214e+08
Experiment: Doug's repeat - plate 3 (1st trial) LACTO Tafa 3.9.8 Active filter: SYBR Green I / HRM Dye (483-533)	D7, D8, D9	7	2	24.1676	0.0941017	1.58019e+06	70059.1	6.32077e+08	96.5	6.55003e+09
Experiment: Doug's repeat - plate 3 (1st trial) LACTO Tafa 3.9.8 Active filter: SYBR Green I / HRM Dye (483-533)	E10, E11, E12	8	2	24.4615	0.0583203	1.37705e+06	37230.2	5.50818e+08	157	3.5084e+09
Experiment: Doug's repeat - plate 3 (1st trial) LACTO Tafa 3.9.8 Active filter: SYBR Green I / HRM Dye (483-533)	A7, A8, A9	9	2	26.272	0.146788	592146	40389.5	2.36858e+08	182.2	1.29999e+09
Experiment: Doug's repeat - plate 3 (1st trial) LACTO Tafa 3.9.8 Active filter: SYBR Green I / HRM Dye (483-533)	C7, C8, C9	11	2	26.3336	0.279221	577640	73005.5	2.31056e+08	128.2	1.80231e+09
Experiment: Doug's repeat - plate 3 (1st trial) LACTO Tafa 3.9.8 Active filter: SYBR Green I / HRM Dye (483-533)	C1, C2, C3	13	2	27.0407	0.0820629	413132	15949.5	1.65253e+08	120.2	1.37482e+09
Experiment: Doug's repeat - plate 3 (1st trial) LACTO Tafa 3.9.8 Active filter: SYBR Green I / HRM Dye (483-533)	A4, A5, A6	15	2	27.364	0.147798	355649	24951.3	1.4226e+08	109.2	1.30274e+09
Experiment: Doug's repeat - plate 3 (1st trial) LACTO Tafa 3.9.8 Active filter: SYBR Green I / HRM Dye (483-533)	E4, E5, E6	34	2	23.2151	0.0544563	2.46414e+06	62571.4	9.85655e+08	117.1	8.41721e+09
Experiment: Doug's repeat - plate 3 (1st trial) LACTO Tafa 3.9.8 Active filter: SYBR Green I / HRM Dye (483-533)	B10, B11, B12	35	2	26.3269	0.095466	576620	25509.8	2.30648e+08	85.6	2.69448e+09
Experiment: Doug's repeat - plate 3 (1st trial) LACTO Tafa 3.9.8 Active filter: SYBR Green I / HRM Dye (483-533)	D1, D2, D3	37	2	25.057	0.0647096	1.04287e+06	31755.1	4.17149e+08	158.7	2.62854e+09
Experiment: Doug's repeat - plate 3 (1st trial) LACTO Tafa 3.9.8 Active filter: SYBR Green I / HRM Dye (483-533)	A1, A2, A3	47	2	24.9558	0.225539	1.09696e+06	111910	4.38785e+08	251.3	1.74606e+09
Experiment: Doug's repeat - plate 3 (1st trial) LACTO Tafa 3.9.8 Active filter: SYBR Green I / HRM Dye (483-533)	D4, D5, D6	57	2	25.2114	0.195184	972687	86950.3	3.89075e+08	136.4	2.85245e+09
Experiment: Doug's repeat - plate 3 (1st trial) LACTO Tafa 3.9.8 Active filter: SYBR Green I / HRM Dye (483-533)	C10, C11, C12	61	2	24.767	0.101701	1.19462e+06	56761.7	4.77847e+08	138	3.46266e+09
Experiment: Doug's repeat - plate 3 (1st trial) LACTO Tafa 3.9.8 Active filter: SYBR Green I / HRM Dye (483-533)	B4, B5, B6	63	2	27.2118	0.0906992	381465	16316.8	1.52586e+08	77.2	1.9765e+09
Experiment: Doug's repeat - plate 3 (1st trial) LACTO Tafa 3.9.8 Active filter: SYBR Green I / HRM Dye (483-533)	B1, B2, B3	68	2	26.7823	0.0746422	466055	16076.1	1.86422e+08	220.8	8.44302e+08
Experiment: Doug's repeat - plate 3 (1st trial) LACTO Tafa 3.9.8 Active filter: SYBR Green I / HRM Dye (483-533)	A10, A11, A12	80	2	25.1236	0.138442	1.01206e+06	66248.6	4.04825e+08	183.4	2.20733e+09
Experiment: Doug's repeat - plate 3 (1st trial) LACTO Tafa 3.9.8 Active filter: SYBR Green I / HRM Dye (483-533)	E1, E2, E3	86	2	29.3966	0.0810704	137530	5257.38	5.50121e+07	153.6	3.58152e+08
Experiment: Doug's repeat - plate 3 (1st trial) LACTO Tafa 3.9.8 Active filter: SYBR Green I / HRM Dye (483-533)	E7, E8, E9	111	2	27.0606	0.0248636	409128	4748.96	1.63651e+08	105.5	1.55119e+09
Experiment: Doug's repeat - plate 3 (1st trial) LACTO Tafa 3.9.8 Active filter: SYBR Green I / HRM Dye (483-533)	D10, D11, D12	115	2	25.432	0.124631	876121	51746.2	3.50448e+08	125	2.80359e+09
Experiment: Doug's repeat - plate 3 (1st trial) LACTO Tafa 3.9.8 Active filter: SYBR Green I / HRM Dye (483-533)	C4, C5, C6	116	2	24.454	0.0357375	1.38166e+06	23057.9	5.52664e+08	122	4.53004e+09
Experiment: Doug's repeat - plate 3 (1st trial) LACTO Tafa 3.9.8 Active filter: SYBR Green I / HRM Dye (483-533)	B7, B8, B9	118	2	24.3139	0.138718	1.47699e+06	93944.4	5.90796e+08	202.7	2.91463e+09

## Sheet: Bif, Lact
Experiment: Doug's repeat - plate 1 BIF Erika 2.9.8 Active filter: SYBR Green I / HRM Dye (483-533)	Control (1)	Manuka Honey (2)
Experiment: Doug's repeat - plate 2 BIF Erika 2.9.8 Active filter: SYBR Green I / HRM Dye (483-533)	3.80014e+09	3.10497e+09
	5.10753e+09	4.2994e+09
	1.05084e+10	5.94592e+09
	1.23847e+10	6.46751e+09
	1.24438e+10	7.57617e+09
	1.34261e+10	8.2169e+09
	1.62409e+10	8.56799e+09
	1.74754e+10	8.71232e+09
	1.99979e+10	9.37125e+09
	2.09954e+10	1.06184e+10
	4.68381e+10	2.22134e+10
	1.52464e+08	4.07925e+08
	2.01894e+08	4.15863e+08
	2.59526e+08	5.1497e+08
	2.81734e+08	6.00094e+08
	2.84192e+08	1.08683e+09
	7.37268e+08	1.83921e+09
	9.96534e+08	1.99433e+09
	2.82486e+09	2.18153e+09
	2.91706e+09	3.42552e+09
	4.87222e+09	5.05098e+09
Mean	9.17839e+09	5.36245e+09
StDev	1.12162e+10	5.10482e+09
SEM	2.44759e+09	1.11396e+09
Experiment: Doug's repeat - plate 1 LACTO Erika 2.9.8 Active filter: SYBR Green I / HRM Dye (483-533)	Control (1)	Manuka Honey (2)
Experiment: Doug's repeat - plate 2 LACTO Tafa 2.9.8 Active filter: SYBR Green I / HRM Dye (483-533)	5.49543e+09	4.0018e+09
	5.63405e+09	4.02389e+09
	9.70583e+09	4.49363e+09
	1.06589e+10	4.9234e+09
	1.09361e+10	5.76893e+09
	1.16269e+10	6.47589e+09
	1.17068e+10	7.02357e+09
	1.35373e+10	7.34344e+09
	1.42383e+10	7.9684e+09
	1.99033e+10	1.72087e+10
	2.71479e+10	2.16388e+10
	3.04146e+08	1.00646e+09
	9.95782e+08	2.19024e+09
	2.55995e+09	2.21969e+09
	3.00195e+09	2.93533e+09
	4.97693e+09	8.04301e+09
	7.31562e+09	8.197e+09
	7.78854e+09	8.55528e+09
	8.23386e+09	8.59017e+09
	8.43235e+09	8.59391e+09
	1.00706e+10	1.03111e+10
Mean	9.25097e+09	7.21489e+09
StDev	6.2428e+09	4.83854e+09
SEM	1.36229e+09	1.05586e+09

## Sheet: Bact, Clost
Experiment: Doug's repeat - plate 1 BACT Erika 26.9.8 Active filter: SYBR Green I / HRM Dye (483-533)	Samples	Mouse	Diet	MeanCp	STD Cp	Mean conc	STD conc	CN in 200 uL undiluted	mg tissue	Copy number/gram
Experiment: Doug's repeat - plate 1 BACT Erika 26.9.8 Active filter: SYBR Green I / HRM Dye (483-533)	C4, C5, C6	1	2	16.7002	0.0438605	1.66614e+07	322404
Experiment: Doug's repeat - plate 1 BACT Erika 26.9.8 Active filter: SYBR Green I / HRM Dye (483-533)	D10, D11, D12	6	1	16.2878	0.0663924	1.99923e+07	586176
Experiment: Doug's repeat - plate 1 BACT Erika 26.9.8 Active filter: SYBR Green I / HRM Dye (483-533)	E7, E8, E9	10	2	15.978	0.02597	2.292e+07	262657
Experiment: Doug's repeat - plate 1 BACT Erika 26.9.8 Active filter: SYBR Green I / HRM Dye (483-533)	B4, B5, B6	11	2	16.0266	0.218126	2.25022e+07	2.20428e+06
Experiment: Doug's repeat - plate 1 BACT Erika 26.9.8 Active filter: SYBR Green I / HRM Dye (483-533)	B10, B11, B12	17	2	15.5719	0.0202389	2.7422e+07	244504
Experiment: Doug's repeat - plate 1 BACT Erika 26.9.8 Active filter: SYBR Green I / HRM Dye (483-533)	E1, E2, E3	18	2	16.526	0.0454933	1.79938e+07	360885
Experiment: Doug's repeat - plate 1 BACT Erika 26.9.8 Active filter: SYBR Green I / HRM Dye (483-533)	B1, B2	21	1	16.3477	0.167972	1.94931e+07	1.44487e+06
Experiment: Doug's repeat - plate 1 BACT Erika 26.9.8 Active filter: SYBR Green I / HRM Dye (483-533)	A4, A5, A6	22	2	16.1724	0.0207289	2.10338e+07	193066
Experiment: Doug's repeat - plate 1 BACT Erika 26.9.8 Active filter: SYBR Green I / HRM Dye (483-533)	F7, F8, F9	23	2	17.4334	0.242508	1.20976e+07	1.32117e+06
Experiment: Doug's repeat - plate 1 BACT Erika 26.9.8 Active filter: SYBR Green I / HRM Dye (483-533)	C1, C2, C3	24	1	16.2996	0.470309	2.01694e+07	4.1258e+06
Experiment: Doug's repeat - plate 1 BACT Erika 26.9.8 Active filter: SYBR Green I / HRM Dye (483-533)	E4, E5, E6	25	1	15.4616	0.233649	2.8894e+07	3.0629e+06
Experiment: Doug's repeat - plate 1 BACT Erika 26.9.8 Active filter: SYBR Green I / HRM Dye (483-533)	A10, A11, A12	26	2	16.0562	0.0126053	2.21412e+07	123285
Experiment: Doug's repeat - plate 1 BACT Erika 26.9.8 Active filter: SYBR Green I / HRM Dye (483-533)	C8, C9	27	1	16.74	0.104156	1.6378e+07	753181
Experiment: Doug's repeat - plate 1 BACT Erika 26.9.8 Active filter: SYBR Green I / HRM Dye (483-533)	B7, B8, B9	28	1	16.4838	0.0526993	1.83337e+07	427894
Experiment: Doug's repeat - plate 1 BACT Erika 26.9.8 Active filter: SYBR Green I / HRM Dye (483-533)	E10, E11, E12	29	1	15.1709	0.119004	3.27643e+07	1.7101e+06
Experiment: Doug's repeat - plate 1 BACT Erika 26.9.8 Active filter: SYBR Green I / HRM Dye (483-533)	D7, D8, D9	30	2	15.9282	0.35201	2.36208e+07	3.74246e+06
Experiment: Doug's repeat - plate 1 BACT Erika 26.9.8 Active filter: SYBR Green I / HRM Dye (483-533)	D1, D2, D3	31	2	15.1692	0.153695	3.28103e+07	2.26912e+06
Experiment: Doug's repeat - plate 1 BACT Erika 26.9.8 Active filter: SYBR Green I / HRM Dye (483-533)	A7, A8, A9	33	1	16.5413	0.0289733	1.78718e+07	228764
Experiment: Doug's repeat - plate 1 BACT Erika 26.9.8 Active filter: SYBR Green I / HRM Dye (483-533)	F4, F5, F6	36	1	15.9866	0.0372947	2.28335e+07	376827
Experiment: Doug's repeat - plate 1 BACT Erika 26.9.8 Active filter: SYBR Green I / HRM Dye (483-533)	A1, A2, A3	37	1	16.0091	0.0885594	2.26174e+07	894080
Experiment: Doug's repeat - plate 1 BACT Erika 26.9.8 Active filter: SYBR Green I / HRM Dye (483-533)	F1, F2, F3	38	2	17.6164	0.0512315	1.11169e+07	250183
Experiment: Doug's repeat - plate 1 BACT Erika 26.9.8 Active filter: SYBR Green I / HRM Dye (483-533)	D4, D5, D6	40	1	17.962	0.00178308	9.54139e+06	7512.76
Experiment: Doug's repeat - plate 1 CLOSTRI Tafa 25.9.8 Active filter: SYBR Green I / HRM Dye (483-533)	C4, C6	1	2	33.7029	0.112795	158137	1412.48
Experiment: Doug's repeat - plate 1 CLOSTRI Tafa 25.9.8 Active filter: SYBR Green I / HRM Dye (483-533)	D10, D12	6	1	34.1761	0.131892	164961	2154.96
Experiment: Doug's repeat - plate 1 CLOSTRI Tafa 25.9.8 Active filter: SYBR Green I / HRM Dye (483-533)	E7, E9	10	2	33.0854	0.0432763	151780	349.969
Experiment: Doug's repeat - plate 1 CLOSTRI Tafa 25.9.8 Active filter: SYBR Green I / HRM Dye (483-533)	B4, B6	11	2	34.7267	0.0464449	175286	994.523
Experiment: Doug's repeat - plate 1 CLOSTRI Tafa 25.9.8 Active filter: SYBR Green I / HRM Dye (483-533)	B10, B11, B12	17	2	32.7893	0.153617	149728	899.973
Experiment: Doug's repeat - plate 1 CLOSTRI Tafa 25.9.8 Active filter: SYBR Green I / HRM Dye (483-533)	E1, E2, E3	18	2	33.8697	0.217528	160435	3037.76
Experiment: Doug's repeat - plate 1 CLOSTRI Tafa 25.9.8 Active filter: SYBR Green I / HRM Dye (483-533)	B1, B3	21	1	34.3418	0.126816	167785	2255.44
Experiment: Doug's repeat - plate 1 CLOSTRI Tafa 25.9.8 Active filter: SYBR Green I / HRM Dye (483-533)	A4, A5, A6	22	2	32.9542	0.116898	150804	867.394
Experiment: Doug's repeat - plate 1 CLOSTRI Tafa 25.9.8 Active filter: SYBR Green I / HRM Dye (483-533)	F7, F8	23	2	33.5957	0.0661675	156822	775.039
Experiment: Doug's repeat - plate 1 CLOSTRI Tafa 25.9.8 Active filter: SYBR Green I / HRM Dye (483-533)	C2, C3	24	1	33.8728	0.269723	160497	3736.54
Experiment: Doug's repeat - plate 1 CLOSTRI Tafa 25.9.8 Active filter: SYBR Green I / HRM Dye (483-533)	E4, E5, E6	25	1	33.4387	0.206875	155169	2107.09
Experiment: Doug's repeat - plate 1 CLOSTRI Tafa 25.9.8 Active filter: SYBR Green I / HRM Dye (483-533)	A10, A11	26	2	32.4645	0.0926151	148044	373.316
Experiment: Doug's repeat - plate 1 CLOSTRI Tafa 25.9.8 Active filter: SYBR Green I / HRM Dye (483-533)	C7, C9	27	1	34.4644	0.0798639	170012	1509.16
Experiment: Doug's repeat - plate 1 CLOSTRI Tafa 25.9.8 Active filter: SYBR Green I / HRM Dye (483-533)	B7, B8	28	1	33.8195	0.121246	159655	1627.67
Experiment: Doug's repeat - plate 1 CLOSTRI Tafa 25.9.8 Active filter: SYBR Green I / HRM Dye (483-533)	E10, E11	29	1	33.4911	0.0207276	155631	226.793
Experiment: Doug's repeat - plate 1 CLOSTRI Tafa 25.9.8 Active filter: SYBR Green I / HRM Dye (483-533)	D7, D8	30	2	32.9631	0.116558	150861	846.629
Experiment: Doug's repeat - plate 1 CLOSTRI Tafa 25.9.8 Active filter: SYBR Green I / HRM Dye (483-533)	D2, D3	31	2	33.9386	0.0264689	161282	380.292
Experiment: Doug's repeat - plate 1 CLOSTRI Tafa 25.9.8 Active filter: SYBR Green I / HRM Dye (483-533)	A7, A8, A9	33	1	32.3131	0.0912268	147510	295.436
Experiment: Doug's repeat - plate 1 CLOSTRI Tafa 25.9.8 Active filter: SYBR Green I / HRM Dye (483-533)	F4, F5	36	1	33.5455	0.172671	156291	1958.83
Experiment: Doug's repeat - plate 1 CLOSTRI Tafa 25.9.8 Active filter: SYBR Green I / HRM Dye (483-533)	A2, A3	37	1	33.208	0.38623	153079	3453.96
Experiment: Doug's repeat - plate 1 CLOSTRI Tafa 25.9.8 Active filter: SYBR Green I / HRM Dye (483-533)	F2, F3	38	2	34.8815	0.0470261	178722	1081.3
Experiment: Doug's repeat - plate 1 CLOSTRI Tafa 25.9.8 Active filter: SYBR Green I / HRM Dye (483-533)	D5, D6	40	1	34.3711	0.254163	168421	4589.82
Experiment: Doug's repeat - plate 1 CLOSTRI Tafa 25.9.8 Active filter: SYBR Green I / HRM Dye (483-533)	G1, G2, G3			17.6331	0.0278999	9.95358e+06	164493
Experiment: Doug's repeat - plate 1 CLOSTRI Tafa 25.9.8 Active filter: SYBR Green I / HRM Dye (483-533)	H4, H5			36.522	1.21767	240636	57324.8
Experiment: Doug's repeat - plate 2 BACT Erika 24.9.8 Active filter: SYBR Green I / HRM Dye (483-533)	E4, E5, E6	2	1	15.496	0.0285256	2.38389e+07	328906
Experiment: Doug's repeat - plate 2 BACT Erika 24.9.8 Active filter: SYBR Green I / HRM Dye (483-533)	A4, A5, A6	3	2	17.4396	0.0218176	9.3237e+06	97950.1
Experiment: Doug's repeat - plate 2 BACT Erika 24.9.8 Active filter: SYBR Green I / HRM Dye (483-533)	E10, E11, E12	4	1	18.0678	0.0847909	6.88736e+06	285247
Experiment: Doug's repeat - plate 2 BACT Erika 24.9.8 Active filter: SYBR Green I / HRM Dye (483-533)	F4, F5, F6	5	1	16.9991	0.0546208	1.15367e+07	305266
Experiment: Doug's repeat - plate 2 BACT Erika 24.9.8 Active filter: SYBR Green I / HRM Dye (483-533)	D7, D8, D9	7	2	16.8057	0.0209069	1.26636e+07	127769
Experiment: Doug's repeat - plate 2 BACT Erika 24.9.8 Active filter: SYBR Green I / HRM Dye (483-533)	C4, C5, C6	8	2	17.1042	0.0525714	1.09653e+07	277882
Experiment: Doug's repeat - plate 2 BACT Erika 24.9.8 Active filter: SYBR Green I / HRM Dye (483-533)	A1, A2, A3	9	1	20.4835	0.0176433	2.14342e+06	18306.8
Experiment: Doug's repeat - plate 2 BACT Erika 24.9.8 Active filter: SYBR Green I / HRM Dye (483-533)	F1, F2, F3	12	2	18.1435	0.0878873	6.64025e+06	278451
Experiment: Doug's repeat - plate 2 BACT Erika 24.9.8 Active filter: SYBR Green I / HRM Dye (483-533)	E1, E2, E3	13	2	17.1577	0.0349232	1.06844e+07	179391
Experiment: Doug's repeat - plate 2 BACT Erika 24.9.8 Active filter: SYBR Green I / HRM Dye (483-533)	D1, D2, D3	14	2	17.1971	0.051641	1.04842e+07	261534
Experiment: Doug's repeat - plate 2 BACT Erika 24.9.8 Active filter: SYBR Green I / HRM Dye (483-533)	A7, A8, A9	15	1	15.808	0.121476	2.0526e+07	1.19398e+06
Experiment: Doug's repeat - plate 2 BACT Erika 24.9.8 Active filter: SYBR Green I / HRM Dye (483-533)	C1, C2, C3	16	1	16.8925	0.0609085	1.21468e+07	354260
Experiment: Doug's repeat - plate 2 BACT Erika 24.9.8 Active filter: SYBR Green I / HRM Dye (483-533)	D4, D5, D6	19	1	18.4901	0.0380235	5.61383e+06	103074
Experiment: Doug's repeat - plate 2 BACT Erika 24.9.8 Active filter: SYBR Green I / HRM Dye (483-533)	E7, E8, E9	20	2	16.6755	0.0505858	1.34875e+07	330081
Experiment: Doug's repeat - plate 2 BACT Erika 24.9.8 Active filter: SYBR Green I / HRM Dye (483-533)	B10, B11, B12	32	2	16.1422	0.0181601	1.74471e+07	153308
Experiment: Doug's repeat - plate 2 BACT Erika 24.9.8 Active filter: SYBR Green I / HRM Dye (483-533)	B1, B2, B3	34	1	16.0201	0.0215098	1.85076e+07	192011
Experiment: Doug's repeat - plate 2 BACT Erika 24.9.8 Active filter: SYBR Green I / HRM Dye (483-533)	B7, B8, B9	35	1	16.0756	0.0509658	1.80206e+07	446279
Experiment: Doug's repeat - plate 2 BACT Erika 24.9.8 Active filter: SYBR Green I / HRM Dye (483-533)	B4, B5, B6	39	2	16.5251	0.0280004	1.45017e+07	196337
Experiment: Doug's repeat - plate 2 BACT Erika 24.9.8 Active filter: SYBR Green I / HRM Dye (483-533)	D10, D11, D12	41	1	16.7053	0.0319826	1.32936e+07	206254
Experiment: Doug's repeat - plate 2 BACT Erika 24.9.8 Active filter: SYBR Green I / HRM Dye (483-533)	A10, A11, A12	42	2	16.1659	0.0809747	1.72566e+07	667719
Experiment: Doug's repeat - plate 2 CLOSTRI Tafa 25.9.8 Active filter: SYBR Green I / HRM Dye (483-533)	E4, E5, E6	2	1	33.1378	0.199082	152690	1645.75
Experiment: Doug's repeat - plate 2 CLOSTRI Tafa 25.9.8 Active filter: SYBR Green I / HRM Dye (483-533)	A4, A5	3	2	34.6311	0.0078371	173722	160.856
Experiment: Doug's repeat - plate 2 CLOSTRI Tafa 25.9.8 Active filter: SYBR Green I / HRM Dye (483-533)	E10, E11	4	1	34.2879	0.207563	167325	3602.69
Experiment: Doug's repeat - plate 2 CLOSTRI Tafa 25.9.8 Active filter: SYBR Green I / HRM Dye (483-533)	F5, F6	5	1	33.1488	0.129487	152722	1106.23
Experiment: Doug's repeat - plate 2 CLOSTRI Tafa 25.9.8 Active filter: SYBR Green I / HRM Dye (483-533)	D7, D8	7	2	33.6596	0.0787199	157994	962.32
Experiment: Doug's repeat - plate 2 CLOSTRI Tafa 25.9.8 Active filter: SYBR Green I / HRM Dye (483-533)	C4, C5	8	2	33.4044	0.346799	155321	3590.53
Experiment: Doug's repeat - plate 2 CLOSTRI Tafa 25.9.8 Active filter: SYBR Green I / HRM Dye (483-533)	A1, A3	9	1	36.3278	0.178405	225643	7621.79
Experiment: Doug's repeat - plate 2 CLOSTRI Tafa 25.9.8 Active filter: SYBR Green I / HRM Dye (483-533)	F1, F2, F3	12	2	34.2327	0.548661	167156	9131.91
Experiment: Doug's repeat - plate 2 CLOSTRI Tafa 25.9.8 Active filter: SYBR Green I / HRM Dye (483-533)	E1, E2, E3	13	2	34.1138	0.527236	165120	8221.32
Experiment: Doug's repeat - plate 2 CLOSTRI Tafa 25.9.8 Active filter: SYBR Green I / HRM Dye (483-533)	D1, D2, D3	14	2	35.5883	0.102314	198344	3209.27
Experiment: Doug's repeat - plate 2 CLOSTRI Tafa 25.9.8 Active filter: SYBR Green I / HRM Dye (483-533)	A7, A9	15	1	31.9632	1.14938	149227	1062.53
Experiment: Doug's repeat - plate 2 CLOSTRI Tafa 25.9.8 Active filter: SYBR Green I / HRM Dye (483-533)	C1, C2, C3	16	1	33.657	0.0990961	157974	1220.9
Experiment: Doug's repeat - plate 2 CLOSTRI Tafa 25.9.8 Active filter: SYBR Green I / HRM Dye (483-533)	D4, D5, D6	19	1	34.2432	0.39041	166908	6702.15
Experiment: Doug's repeat - plate 2 CLOSTRI Tafa 25.9.8 Active filter: SYBR Green I / HRM Dye (483-533)	E7, E8, E9	20	2	34.6987	0.1109	175173	2385.63
Experiment: Doug's repeat - plate 2 CLOSTRI Tafa 25.9.8 Active filter: SYBR Green I / HRM Dye (483-533)	B10, B11	32	2	34.0751	0.0290101	163737	450.356
Experiment: Doug's repeat - plate 2 CLOSTRI Tafa 25.9.8 Active filter: SYBR Green I / HRM Dye (483-533)	B2, B3	34	1	34.0316	0.0562757	163074	853.323
Experiment: Doug's repeat - plate 2 CLOSTRI Tafa 25.9.8 Active filter: SYBR Green I / HRM Dye (483-533)	B7, B8, B9	35	1	33.9058	0.123988	161266	1736.6
Experiment: Doug's repeat - plate 2 CLOSTRI Tafa 25.9.8 Active filter: SYBR Green I / HRM Dye (483-533)	B4, B5, B6	39	2	33.1141	0.143944	152449	1165.93
Experiment: Doug's repeat - plate 2 CLOSTRI Tafa 25.9.8 Active filter: SYBR Green I / HRM Dye (483-533)	D11, D12	41	1	33.7343	0.0669534	158925	856.651
Experiment: Doug's repeat - plate 2 CLOSTRI Tafa 25.9.8 Active filter: SYBR Green I / HRM Dye (483-533)	A11, A12	42	2	33.7051	0.175241	158605	2203.54

## Sheet: Ecoli data
Experiment	Mouse	Diet	MeanCp	STD Cp	Mean conc	STD conc	CN in 200 uL undiluted	mg tissue	Copy number/gram
Experiment: Doug's repeat - plate 2 ECOLI Tafa 30.10.8 Active filter: SYBR Green I / HRM Dye (483-533)	2	1	30.7887	0.333266	1342.83	286.273	537131	76	7.06752e+06
Experiment: Doug's repeat - plate 2 ECOLI Tafa 30.10.8 Active filter: SYBR Green I / HRM Dye (483-533)	4	1	33.8842	0.105763	162.969	11.8081	65187.6	97	672037
Experiment: Doug's repeat - plate 2 ECOLI Tafa 30.10.8 Active filter: SYBR Green I / HRM Dye (483-533)	5	1	28.5673	0.0790641	5744.27	301.463	2.29771e+06	118	1.94721e+07
Experiment: Doug's repeat - plate 1 ECOLI Tafa 24.9.8 Active filter: SYBR Green I / HRM Dye (483-533)	6	1	26.9627	0.0689105	15248.2	685.133	6.09928e+06	148	4.12114e+07
Experiment: Doug's repeat - plate 2 ECOLI Tafa 30.10.8 Active filter: SYBR Green I / HRM Dye (483-533)	9	1	33.0313	0.0847466	291.731	16.8192	116692	114	1.02362e+06
Experiment: Doug's repeat - plate 2 ECOLI Tafa 30.10.8 Active filter: SYBR Green I / HRM Dye (483-533)	15	1	29.822	0.095266	2516.37	161.35	1.00655e+06	151	6.66588e+06
Experiment: Doug's repeat - plate 2 ECOLI Tafa 30.10.8 Active filter: SYBR Green I / HRM Dye (483-533)	16	1	30.5306	0.0995873	1572.29	104.253	628917	184	3.41803e+06
Experiment: Doug's repeat - plate 2 ECOLI Tafa 30.10.8 Active filter: SYBR Green I / HRM Dye (483-533)	19	1	31.7887	0.0486739	676.307	22.3555	270523	118	2.29257e+06
Experiment: Doug's repeat - plate 1 ECOLI Tafa 24.9.8 Active filter: SYBR Green I / HRM Dye (483-533)	21	1	30.6913	0.158136	1323.85	139.367	529542	110	4.81401e+06
Experiment: Doug's repeat - plate 1 ECOLI Tafa 24.9.8 Active filter: SYBR Green I / HRM Dye (483-533)	24	1	26.2832	0.14059	23651.4	2085.88	9.46055e+06	125	7.56844e+07
Experiment: Doug's repeat - plate 1 ECOLI Tafa 24.9.8 Active filter: SYBR Green I / HRM Dye (483-533)	25	1	32.6869	0.257701	348.237	60.1519	139295	76	1.83283e+06
Experiment: Doug's repeat - plate 1 ECOLI Tafa 24.9.8 Active filter: SYBR Green I / HRM Dye (483-533)	27	1	34.3432	0.684447	119.034	50.9393	47613.8	66	721421
Experiment: Doug's repeat - plate 1 ECOLI Tafa 24.9.8 Active filter: SYBR Green I / HRM Dye (483-533)	28	1	30.7022	0.105309	1312.76	92.7037	525104	72	7.29311e+06
Experiment: Doug's repeat - plate 1 ECOLI Tafa 24.9.8 Active filter: SYBR Green I / HRM Dye (483-533)	29	1	31.7854	0.0919364	634.762	39.2714	253905	105	2.41814e+06
Experiment: Doug's repeat - plate 1 ECOLI Tafa 24.9.8 Active filter: SYBR Green I / HRM Dye (483-533)	33	1	27.9201	0.17094	8228.05	889.809	3.29122e+06	82	4.01368e+07
Experiment: Doug's repeat - plate 2 ECOLI Tafa 30.10.8 Active filter: SYBR Green I / HRM Dye (483-533)	34	1	28.606	0.0243134	5596.3	89.45	2.23852e+06	89	2.51519e+07
Experiment: Doug's repeat - plate 2 ECOLI Tafa 30.10.8 Active filter: SYBR Green I / HRM Dye (483-533)	35	1	27.9912	0.0605487	8363.76	333.287	3.3455e+06	151	2.21557e+07
Experiment: Doug's repeat - plate 1 ECOLI Tafa 24.9.8 Active filter: SYBR Green I / HRM Dye (483-533)	36	1	32.0131	0.239761	548.491	84.5304	219396	78	2.81277e+06
Experiment: Doug's repeat - plate 1 ECOLI Tafa 24.9.8 Active filter: SYBR Green I / HRM Dye (483-533)	37	1	33.5601	0.089536	190.43	11.4537	76172.1	155	491433
Experiment: Doug's repeat - plate 1 ECOLI Tafa 24.9.8 Active filter: SYBR Green I / HRM Dye (483-533)	40	1	34.4625	1.06442	122.296	89.593	48918.4	139	351931
Experiment: Doug's repeat - plate 2 ECOLI Tafa 30.10.8 Active filter: SYBR Green I / HRM Dye (483-533)	41	1	29.3866	0.116406	3357.25	262.999	1.3429e+06	100	1.3429e+07
Experiment: Doug's repeat - plate 1 ECOLI Tafa 24.9.8 Active filter: SYBR Green I / HRM Dye (483-533)	1	2	29.3946	0.0734234	3122.01	153.133	1.2488e+06	75	1.66507e+07
Experiment: Doug's repeat - plate 2 ECOLI Tafa 30.10.8 Active filter: SYBR Green I / HRM Dye (483-533)	3	2	30.915	0.148823	1218.73	118.396	487493	86	5.66852e+06
Experiment: Doug's repeat - plate 2 ECOLI Tafa 30.10.8 Active filter: SYBR Green I / HRM Dye (483-533)	7	2	29.3204	0.111429	3506.29	257.918	1.40251e+06	133	1.05452e+07
Experiment: Doug's repeat - plate 2 ECOLI Tafa 30.10.8 Active filter: SYBR Green I / HRM Dye (483-533)	8	2	29.6838	0.0927174	2757.05	170.768	1.10282e+06	130	8.48323e+06
Experiment: Doug's repeat - plate 1 ECOLI Tafa 24.9.8 Active filter: SYBR Green I / HRM Dye (483-533)	10	2	29.4786	0.164022	2962.61	314.904	1.18504e+06	134	8.84361e+06
Experiment: Doug's repeat - plate 1 ECOLI Tafa 24.9.8 Active filter: SYBR Green I / HRM Dye (483-533)	11	2	29.8519	0.0971194	2309.3	150.623	923719	96	9.62207e+06
Experiment: Doug's repeat - plate 2 ECOLI Tafa 30.10.8 Active filter: SYBR Green I / HRM Dye (483-533)	12	2	29.4093	0.124139	3308.07	264.281	1.32323e+06	151	8.76309e+06
Experiment: Doug's repeat - plate 2 ECOLI Tafa 30.10.8 Active filter: SYBR Green I / HRM Dye (483-533)	13	2	27.771	0.0544161	9650.96	338.485	3.86038e+06	128	3.01592e+07
Experiment: Doug's repeat - plate 2 ECOLI Tafa 30.10.8 Active filter: SYBR Green I / HRM Dye (483-533)	14	2	32.8719	0.147375	325.928	32.5588	130371	148	880886
Experiment: Doug's repeat - plate 1 ECOLI Tafa 24.9.8 Active filter: SYBR Green I / HRM Dye (483-533)	17	2	34.0632	0.210309	135.643	18.8359	54257.3	107	507078
Experiment: Doug's repeat - plate 1 ECOLI Tafa 24.9.8 Active filter: SYBR Green I / HRM Dye (483-533)	18	2	31.675	0.195824	686	90.1099	274400	86	3.1907e+06
Experiment: Doug's repeat - plate 2 ECOLI Tafa 30.10.8 Active filter: SYBR Green I / HRM Dye (483-533)	20	2	32.6019	0.412401	400.421	112.574	160169	101	1.58583e+06
Experiment: Doug's repeat - plate 1 ECOLI Tafa 24.9.8 Active filter: SYBR Green I / HRM Dye (483-533)	22	2	30.6927	0.110367	1321.35	99.1852	528540	113	4.67735e+06
Experiment: Doug's repeat - plate 1 ECOLI Tafa 24.9.8 Active filter: SYBR Green I / HRM Dye (483-533)	23	2	29.6419	0.160717	2659.41	275.884	1.06376e+06	134	7.93854e+06
Experiment: Doug's repeat - plate 1 ECOLI Tafa 24.9.8 Active filter: SYBR Green I / HRM Dye (483-533)	26	2	28.5349	0.0275257	5487.45	98.5374	2.19498e+06	141	1.55672e+07
Experiment: Doug's repeat - plate 1 ECOLI Tafa 24.9.8 Active filter: SYBR Green I / HRM Dye (483-533)	30	2	31.7487	0.195903	653.831	88.3327	261533	120	2.17944e+06
Experiment: Doug's repeat - plate 1 ECOLI Tafa 24.9.8 Active filter: SYBR Green I / HRM Dye (483-533)	31	2	30.1843	0.100038	1852.62	121.643	741050	113	6.55796e+06
Experiment: Doug's repeat - plate 2 ECOLI Tafa 30.10.8 Active filter: SYBR Green I / HRM Dye (483-533)	32	2	29.7761	0.129349	2596.88	224.942	1.03875e+06	77	1.34903e+07
Experiment: Doug's repeat - plate 1 ECOLI Tafa 24.9.8 Active filter: SYBR Green I / HRM Dye (483-533)	38	2	28.4921	0.143748	5659.17	536.962	2.26367e+06	80	2.82959e+07
Experiment: Doug's repeat - plate 2 ECOLI Tafa 30.10.8 Active filter: SYBR Green I / HRM Dye (483-533)	39	2	25.6477	0.0242477	37836.2	582.187	1.51345e+07	152	9.9569e+07
Experiment: Doug's repeat - plate 2 ECOLI Tafa 30.10.8 Active filter: SYBR Green I / HRM Dye (483-533)	42	2	35.1649	0.129829	67.4445	6.06159	26977.8	79	341491

## Sheet: qPCR data
CTRL	AVG	STDEV	SEM		honey	AVG	STDEV	SEM
Ecoli	1.32913e+07	1.89972e+07	4.14552e+06			1.35008e+07	2.13395e+07	4.65665e+06
Bact	6.86648e+10	3.97984e+10	8.8992e+09			6.31038e+10	2.80034e+10	6.26176e+09
bif	9.17839e+09	1.12162e+10	2.44759e+09			5.36245e+09	5.10482e+09	1.11396e+09
clos	6.28601e+08	1.85707e+08	4.15254e+07			6.06029e+08	1.63199e+08	3.64924e+07
lact	9.25097e+09	6.2428e+09	1.36229e+09			7.21489e+09	4.83854e+09	1.05586e+09
Ecoli	7.12357	7.27869	6.61758			7.13036	7.32918	6.66807
Bact	10.8367	10.5999	9.94935			10.8001	10.4472	9.7967
bif	9.96277	10.0498	9.38874			9.72936	9.70798	9.04687
clos	8.79837	8.26883	7.61831			8.78249	8.21272	7.5622
lact	9.96619	9.79538	9.13427			9.85823	9.68471	9.02361
