# Supplementary material for: Consumption of antimicrobial manuka honey does not significantly perturb the microbiota in the hind gut of mice
Source: PeerJ. 2016 Dec 20;4:e2787. doi: 10.7717/peerj.2787 (PMC5178337; doi:10.7717/peerj.2787)
Supplement: Data S2 [file peerj-04-2787-s002.xls]

## Sheet: raw
DIET	ANIMAL	Replicate	TREATMENT	Formic	Acetic	Propionic	Iso-butyric	Butyric	2-Ethylbutyric	Lactic	Succinic
N/A	10 mM	1	STD	89896	63404	142727	212191	202037	95097	16770	63845
N/A	10 mM	2	STD	81161	59300	132362	196986	188531	86917	19778	59636
N/A	5 mM	1	STD	48552	29077	60897	87929	82771	82275	7112	26922
N/A	5 mM	2	STD	45671	27080	55930	81510	76834	76875	8426	29974
N/A	2.5 mM	1	STD	35667	14424	30152	46107	44502	87232	3536	13671
N/A	2.5 mM	2	STD	32472	12715	27887	40714	39403	77622	4094	12372
N/A	1.25 mM	1	STD	29359	7809	16698	23543	22910	87482		6870
N/A	1.25 mM	2	STD	25961	6607	14100	19950	19434	74939	0	6086
N/A	0.625 mM	1	STD
N/A	0.625 mM	2	STD
N/A	0.3125 mM	1	STD
N/A	0.3125 mM	2	STD
N/A	0.156 mM	1	STD
N/A	0.156 mM	2	STD
N/A	0.078 mM	1	STD
N/A	0.078 mM	2	STD
2	1	1	Honey	45410	11354	0	0	6511	105525	0	0
2	1	2	Honey	45478	11534	0	0	6632	106791	0	0
1	2	1	Control
1	2	2	Control
2	3	1	Honey
2	3	2	Honey
1	4	1	Control
1	4	2	Control
1	5	1	Control
1	5	2	Control
1	6	1	Control
1	6	2	Control
2	7	1	Honey	24184	8091	3962	0	3030	94773	0	0
2	7	2	Honey	24280	8367	4070	0	3122	96408	0	0
2	8	1	Honey	22678	8559	3277	0	0	87133	0	0
2	8	2	Honey	22422	8462	4246	0	3013	86980	0	0
1	9	1	Control	26777	6849	4538	0	0	90684	0	0
1	9	2	Control	26942	6892	4463	0	0	91245	0	0
2	10	1	Honey	28510	8031	4714	0	3241	87782	0	0
2	10	2	Honey	28453	8078	5762	0	3312	88121	0	0
2	11	1	Honey
2	11	2	Honey
2	12	1	Honey	27346	12021	5158	0	4542	108976	0	0
2	12	2	Honey	23484	10515	4653	0	3907	96019	0	0
2	13	1	Honey	55913	25427	14307	4995	11952	265441	0	0
2	13	2	Honey
2	14	1	Honey	18537	8322	3869	0	4280	93363	0	0
2	14	2	Honey	19019	8341	3856	0	4351	94317	0	0
1	15	1	Control	19795	11724	5581	0	4873	93961	0	0
1	15	2	Control	19951	11742	5538	0	4925	94617	0	0
1	16	1	Control	19151	6613	3541	0	0	92942	0	0
1	16	2	Control	19180	6559	3519	0	0	91936	0	0
2	17	1	Honey	18034	13316	3771	0	6698	95298	0	0
2	17	2	Honey	18482	13491	3845	0	6771	96359	0	3179
2	18	1	Honey	51899	16178	13288	8938	8532	301260	3161	0
2	18	2	Honey
1	19	1	Control	17799	6781	4313	0	0	102953	0	8905
1	19	2	Control	18206	7015	4386	0	3004	105185	0	0
2	20	1	Honey	22285	6562	3186	0	3245	91240	0	0
2	20	2	Honey	22275	6433	3106	0	3266	91242	0	0
1	21	1	Honey	17492	6586	3434	0	3019	96582	0	3953
1	21	2	Honey	17390	6546	3520	0	3124	96898	0	0
2	22	1	Honey	14566	7996	3683	0	5551	94278	0	0
2	22	2	Honey	14762	8022	3672	0	5482	94569	0	0
2	23	1	Honey	14560	5858	3098	0	0	92061	0	0
2	23	2	Honey	15021	5773	3247	0	0	92524	0	0
1	24	1	Control	42195	19109	12583	8291	7388	300465	4084	0
1	24	2	Control	29366	13247	7767	3848	4516	209906	0	0
1	25	1	Control	15359	11718	4921	0	7921	94230	0	10056
1	25	2	Control
2	26	1	Honey	15111	8421	4642	0	4370	95186	0	5949
2	26	2	Honey	15379	8376	4602	0	4435	95506	0	0
1	27	1	Control	14398	5147	0	0	0	88990	0	0
1	27	2	Control	14453	5277	0	0	0	89814	0	0
1	28	1	Control	14052	9810	3798	0	5116	90486	0	5612
1	28	2	Control	14539	10117	3869	0	5280	92816	0	5049
1	29	1	Control	13998	6352	3911	0	0	91253	0	0
1	29	2	Control
2	30	1	Honey	14542	0	0	0	0	86512	0	0
2	30	2	Honey	14534	3138	0	0	0	86981	0	5934
2	31	1	Honey	16083	8490	3775	0	5414	89468	0	0
2	31	2	Honey	16366	8592	3801	0	5384	90482	0	0
2	32	1	Honey	14302	8995	3859	0	4399	90024	0	0
2	32	2	Honey	14256	8726	3927	0	4452	89717	0	0
1	33	1	Control	13681	7751	3626	0	5246	89882	0	0
1	33	2	Control	13697	8001	3641	0	5238	90129	0	0
1	34	1	Control	13525	8436	3086	0	4647	89076	0	0
1	34	2	Control	13571	8604	3180	0	4775	90537	0	0
1	35	1	Control	13467	8605	3890	0	3889	92692	0	0
1	35	2	Control	13551	8720	3938	0	3908	92920	0	0
1	36	1	Control	13051	11615	5003	0	6558	92882	0	4773
1	36	2	Control	13345	11717	5108	0	6704	94685	0	5101
1	37	1	Control	11791	8540	4948	0	4685	95682	0	0
1	37	2	Control	13864	9802	4962	0	5434	109491	0	0
2	38	1	Honey	14186	5897	4502	0	3202	53743	0	0
2	38	2	Honey	14232	5811	4257	0	3250	54015	0	0
2	39	1	Honey	12427	6866	3517	0	0	103645	0	0
2	39	2	Honey	12494	6951	3423	0	3167	105047	0	0
1	40	1	Control	14393	7132	3456	0	3690	94543	0	0
1	40	2	Control	14188	7091	5158	0	3593	93540	0	0

## Sheet: 2-EB normalised
DIET	ANIMAL	Replicate	TREATMENT	Formic	Acetic	Propionic	Iso-butyric	Butyric	2-Ethylbutyric	Lactic	Succinic
N/A	10 mM	1	STD	0.945308	0.66673	1.50086	2.23131	2.12454	1		0.671367		10
N/A	10 mM	2	STD	0.933776	0.68226	1.52286	2.26637	2.16909	1	0.22755	0.686126		10
N/A	5 mM	1	STD	0.590119	0.353412	0.740164	1.06872	1.00603	1	0.0864418	0.32722		5
N/A	5 mM	2	STD	0.594094	0.35226	0.727545	1.06029	0.999467	1	0.109607	0.389906		5
N/A	2.5 mM	1	STD	0.408875	0.165352	0.345653	0.528556	0.510157	1	0.0405356	0.15672		2.5
N/A	2.5 mM	2	STD	0.418335	0.163807	0.359267	0.524516	0.507627	1	0.0527428	0.159388		2.5
N/A	1.25 mM	1	STD	0.3356	0.0892641	0.190874	0.269118	0.261882	1		0.0785304		1.25
N/A	1.25 mM	2	STD	0.346428	0.088165	0.188153	0.266217	0.259331	1	0	0.0812127		1.25
N/A	0.625 mM	1	STD										0.625
N/A	0.625 mM	2	STD										0.625
N/A	0.3125 mM	1	STD										0.3125
N/A	0.3125 mM	2	STD										0.3125
N/A	0.156 mM	1	STD										0.156
N/A	0.156 mM	2	STD										0.156
N/A	0.078 mM	1	STD										0.078
N/A	0.078 mM	2	STD										0.078
2	1	1	Honey	0.430325	0.107595	0	0	0.061701	1	0	0
2	1	2	Honey	0.42586	0.108005	0	0	0.0621026	1	0	0
1	2	1	Control
1	2	2	Control
2	3	1	Honey
2	3	2	Honey
1	4	1	Control
1	4	2	Control
1	5	1	Control
1	5	2	Control
1	6	1	Control
1	6	2	Control
2	7	1	Honey	0.255178	0.0853724	0.0418052	0	0.0319711	1	0	0
2	7	2	Honey	0.251846	0.0867874	0.0422164	0	0.0323832	1	0	0
2	8	1	Honey	0.260269	0.0982291	0.0376092	0	0	1	0	0
2	8	2	Honey	0.257783	0.0972867	0.0488158	0	0.0346401	1	0	0
1	9	1	Control	0.295278	0.075526	0.0500419	0	0	1	0	0
1	9	2	Control	0.295271	0.0755329	0.0489123	0	0	1	0	0
2	10	1	Honey	0.324782	0.091488	0.0537012	0	0.036921	1	0	0
2	10	2	Honey	0.322886	0.0916694	0.0653874	0	0.0375847	1	0	0
2	11	1	Honey
2	11	2	Honey
2	12	1	Honey	0.250936	0.110309	0.0473315	0	0.0416789	1	0	0
2	12	2	Honey	0.244577	0.10951	0.0484592	0	0.0406899	1	0	0
2	13	1	Honey	0.210642	0.0957915	0.053899	0.0188177	0.045027	1	0	0
2	13	2	Honey
2	14	1	Honey	0.198548	0.089136	0.0414404	0	0.0458426	1	0	0
2	14	2	Honey	0.20165	0.0884358	0.0408834	0	0.0461317	1	0	0
1	15	1	Control	0.210673	0.124775	0.059397	0	0.0518619	1	0	0
1	15	2	Control	0.210861	0.1241	0.0585307	0	0.052052	1	0	0
1	16	1	Control	0.206053	0.0711519	0.038099	0	0	1	0	0
1	16	2	Control	0.208623	0.0713431	0.0382766	0	0	1	0	0
2	17	1	Honey	0.189238	0.13973	0.0395706	0	0.0702848	1	0	0
2	17	2	Honey	0.191804	0.140008	0.0399029	0	0.0702685	1	0	0.0329912
2	18	1	Honey	0.172273	0.0537011	0.0441081	0.0296687	0.0283211	1	0.0104926	0
2	18	2	Honey
1	19	1	Control	0.172885	0.065865	0.0418929	0	0	1	0	0.0864958
1	19	2	Control	0.173086	0.066692	0.041698	0	0.0285592	1	0	0
2	20	1	Honey	0.244246	0.0719202	0.0349189	0	0.0355655	1	0	0
2	20	2	Honey	0.244131	0.0705048	0.0340413	0	0.0357949	1	0	0
1	21	1	Honey	0.18111	0.0681908	0.0355553	0	0.0312584	1	0	0.040929
1	21	2	Honey	0.179467	0.0675556	0.0363269	0	0.0322401	1	0	0
2	22	1	Honey	0.154501	0.084813	0.0390653	0	0.0588791	1	0	0
2	22	2	Honey	0.156098	0.084827	0.0388288	0	0.0579683	1	0	0
2	23	1	Honey	0.158156	0.0636317	0.0336516	0	0	1	0	0
2	23	2	Honey	0.162347	0.0623946	0.0350936	0	0	1	0	0
1	24	1	Control	0.140432	0.0635981	0.0418784	0.0275939	0.0245886	1	0.0135923	0
1	24	2	Control	0.139901	0.0631092	0.0370023	0.018332	0.0215144	1	0	0
1	25	1	Control	0.162995	0.124355	0.0522233	0	0.0840603	1	0	0.106718
1	25	2	Control
2	26	1	Honey	0.158752	0.0884689	0.0487677	0	0.0459101	1	0	0.0624987
2	26	2	Honey	0.161027	0.0877013	0.0481855	0	0.0464369	1	0	0
1	27	1	Control	0.161793	0.057838	0	0	0	1	0	0
1	27	2	Control	0.160921	0.0587548	0	0	0	1	0	0
1	28	1	Control	0.155295	0.108415	0.0419733	0	0.0565391	1	0	0.0620206
1	28	2	Control	0.156643	0.109001	0.0416846	0	0.0568867	1	0	0.0543979
1	29	1	Control	0.153398	0.0696087	0.0428589	0	0	1	0	0
1	29	2	Control
2	30	1	Honey	0.168092	0	0	0	0	1	0	0
2	30	2	Honey	0.167094	0.0360768	0	0	0	1	0	0.0682218
2	31	1	Honey	0.179763	0.0948943	0.0421939	0	0.0605133	1	0	0
2	31	2	Honey	0.180876	0.0949581	0.0420084	0	0.0595035	1	0	0
2	32	1	Honey	0.158869	0.0999178	0.0428663	0	0.0488647	1	0	0
2	32	2	Honey	0.1589	0.0972614	0.043771	0	0.0496227	1	0	0
1	33	1	Control	0.152211	0.0862353	0.0403418	0	0.0583654	1	0	0
1	33	2	Control	0.151971	0.0887728	0.0403977	0	0.0581167	1	0	0
1	34	1	Control	0.151837	0.0947056	0.0346446	0	0.0521689	1	0	0
1	34	2	Control	0.149895	0.095033	0.0351238	0	0.0527409	1	0	0
1	35	1	Control	0.145288	0.0928343	0.0419669	0	0.0419562	1	0	0
1	35	2	Control	0.145835	0.0938442	0.0423805	0	0.0420577	1	0	0
1	36	1	Control	0.140512	0.125051	0.053864	0	0.0706057	1	0	0.0513878
1	36	2	Control	0.140941	0.123747	0.0539473	0	0.0708032	1	0	0.0538734
1	37	1	Control	0.123231	0.089254	0.051713	0	0.0489643	1	0	0
1	37	2	Control	0.126622	0.0895233	0.0453188	0	0.0496296	1	0	0
2	38	1	Honey	0.26396	0.109726	0.083769	0	0.0595799	1	0	0
2	38	2	Honey	0.263482	0.107581	0.0788114	0	0.0601685	1	0	0
2	39	1	Honey	0.1199	0.0662454	0.0339331	0	0	1	0	0
2	39	2	Honey	0.118937	0.0661704	0.0325854	0	0.0301484	1	0	0
1	40	1	Control	0.152238	0.0754366	0.0365548	0	0.0390299	1	0	0
1	40	2	Control	0.151678	0.0758071	0.0551422	0	0.0384114	1	0	0

## Sheet: conc mM
DIET	ANIMAL	Replicate	TREATMENT	Formic	Acetic	Propionic	Iso-butyric	Butyric	2-Ethylbutyric	Lactic	Succinic
N/A	10 mM	1	STD	0.945308	0.66673	1.50086	2.23131	2.12454	1		0.671367		10
N/A	10 mM	2	STD	0.933776	0.68226	1.52286	2.26637	2.16909	1	0.22755	0.686126		10
N/A	5 mM	1	STD	0.590119	0.353412	0.740164	1.06872	1.00603	1	0.0864418	0.32722		5
N/A	5 mM	2	STD	0.594094	0.35226	0.727545	1.06029	0.999467	1	0.109607	0.389906		5
N/A	2.5 mM	1	STD	0.408875	0.165352	0.345653	0.528556	0.510157	1	0.0405356	0.15672		2.5
N/A	2.5 mM	2	STD	0.418335	0.163807	0.359267	0.524516	0.507627	1	0.0527428	0.159388		2.5
N/A	1.25 mM	1	STD	0.3356	0.0892641	0.190874	0.269118	0.261882	1		0.0785304		1.25
N/A	1.25 mM	2	STD	0.346428	0.088165	0.188153	0.266217	0.259331	1	0	0.0812127		1.25
N/A	0.625 mM	1	STD										0.625
N/A	0.625 mM	2	STD										0.625
N/A	0.3125 mM	1	STD										0.3125
N/A	0.3125 mM	2	STD										0.3125
N/A	0.156 mM	1	STD										0.156
N/A	0.156 mM	2	STD										0.156
N/A	0.078 mM	1	STD										0.078
N/A	0.078 mM	2	STD										0.078
2	1	1	Honey	2.63949	1.53554	0	0	0.440079	1	0	0
2	1	2	Honey	2.57478	1.54162	0	0	0.441937	1	0	0
1	2	1	Control
1	2	2	Control
2	3	1	Honey
2	3	2	Honey
1	4	1	Control
1	4	2	Control
1	5	1	Control
1	5	2	Control
1	6	1	Control
1	6	2	Control
2	7	1	Honey	0.101133	1.20582	0.384397	0	0.302504	1	0	0
2	7	2	Honey	0.0528452	1.22682	0.387099	0	0.304411	1	0	0
2	8	1	Honey	0.17491	1.39657	0.356828	0	0	1	0	0
2	8	2	Honey	0.13889	1.38259	0.430459	0	0.314855	1	0	0
1	9	1	Control	0.682291	1.05973	0.438514	0	0	1	0	0
1	9	2	Control	0.682188	1.05984	0.431092	0	0	1	0	0
2	10	1	Honey	1.10988	1.29656	0.462557	0	0.32541	1	0	0
2	10	2	Honey	1.0824	1.29925	0.539339	0	0.328481	1	0	0
2	11	1	Honey			0.109724
2	11	2	Honey			0.109724
2	12	1	Honey	0.039652	1.5758	0.420706	0	0.347427	1	0	0
2	12	2	Honey	-0.0525131	1.56394	0.428115	0	0.34285	1	0	0
2	13	1	Honey	-0.54432	1.36041	0.463857	0.251399	0.36292	1	0	0
2	13	2	Honey
2	14	1	Honey	-0.7196	1.26166	0.382	0	0.366694	1	0	0
2	14	2	Honey	-0.674641	1.25127	0.37834	0	0.368032	1	0	0
1	15	1	Control	-0.543877	1.79043	0.49998	0	0.394549	1	0	0
1	15	2	Control	-0.54115	1.78042	0.494288	0	0.395428	1	0	0
1	16	1	Control	-0.610823	0.994835	0.360046	0	0	1	0	0
1	16	2	Control	-0.573574	0.997672	0.361213	0	0	1	0	0
2	17	1	Honey	-0.854522	2.01232	0.369715	0	0.4798	1	0	0
2	17	2	Honey	-0.81734	2.01643	0.371898	0	0.479725	1	0	0.541902
2	18	1	Honey	-1.10039	0.735922	0.399527	0.299158	0.285613	1	1.34508	0
2	18	2	Honey			0.109724
1	19	1	Control	-1.09153	0.916395	0.384973	0	0	1	0	1.31733
1	19	2	Control	-1.08862	0.928665	0.383692	0	0.286715	1	0	0
2	20	1	Honey	-0.0573051	1.00623	0.339152	0	0.319137	1	0	0
2	20	2	Honey	-0.0589711	0.985235	0.333386	0	0.320199	1	0	0
1	21	1	Honey	-0.972314	0.950901	0.343333	0	0.299206	1	0	0.656941
1	21	2	Honey	-0.996129	0.941477	0.348402	0	0.303749	1	0	0
2	22	1	Honey	-1.35796	1.19752	0.366395	0	0.42702	1	0	0
2	22	2	Honey	-1.33482	1.19773	0.364841	0	0.422805	1	0	0
2	23	1	Honey	-1.30499	0.88326	0.330825	0	0	1	0	0
2	23	2	Honey	-1.24425	0.864905	0.3403	0	0	1	0	0
1	24	1	Control	-1.56185	0.882761	0.384878	0.290026	0.268341	1	1.46957	0
1	24	2	Control	-1.56955	0.875507	0.35284	0.249261	0.254116	1	0	0
1	25	1	Control	-1.23486	1.7842	0.452847	0	0.543546	1	0	1.6104
1	25	2	Control			0.109724
2	26	1	Honey	-1.29634	1.25176	0.430142	0	0.367007	1	0	0.969546
2	26	2	Honey	-1.26338	1.24038	0.426317	0	0.369444	1	0	0
1	27	1	Control	-1.25227	0.797299	0	0	0	1	0	0
1	27	2	Control	-1.26491	0.810901	0	0	0	1	0	0
1	28	1	Control	-1.34645	1.54769	0.385502	0	0.416192	1	0	0.962618
1	28	2	Control	-1.32691	1.55639	0.383605	0	0.417801	1	0	0.852144
1	29	1	Control	-1.37395	0.971939	0.39132	0	0	1	0	0
1	29	2	Control
2	30	1	Honey	-1.16098	0	0	0	0	1	0	0
2	30	2	Honey	-1.17545	0.474434	0	0	0	1	0	1.05249
2	31	1	Honey	-0.991846	1.3471	0.38695	0	0.434582	1	0	0
2	31	2	Honey	-0.975714	1.34804	0.385732	0	0.42991	1	0	0
2	32	1	Honey	-1.29466	1.42163	0.391369	0	0.380679	1	0	0
2	32	2	Honey	-1.29421	1.38222	0.397313	0	0.384186	1	0	0
1	33	1	Control	-1.39115	1.21862	0.374782	0	0.424643	1	0	0
1	33	2	Control	-1.39462	1.25627	0.375149	0	0.423492	1	0	0
1	34	1	Control	-1.39657	1.3443	0.337349	0	0.395969	1	0	0
1	34	2	Control	-1.42472	1.34915	0.340498	0	0.398616	1	0	0
1	35	1	Control	-1.49148	1.31653	0.38546	0	0.34871	1	0	0
1	35	2	Control	-1.48355	1.33152	0.388177	0	0.349179	1	0	0
1	36	1	Control	-1.5607	1.79453	0.463627	0	0.481285	1	0	0.808519
1	36	2	Control	-1.55448	1.77518	0.464174	0	0.482199	1	0	0.844542
1	37	1	Control	-1.81114	1.26341	0.449494	0	0.38114	1	0	0
1	37	2	Control	-1.762	1.26741	0.407482	0	0.384219	1	0	0
2	38	1	Honey	0.228405	1.56715	0.660112	0	0.430263	1	0	0
2	38	2	Honey	0.221484	1.53533	0.627539	0	0.432987	1	0	0
2	39	1	Honey	-1.85943	0.922038	0.332675	0	0	1	0	0
2	39	2	Honey	-1.87337	0.920926	0.32382	0	0.294069	1	0	0
1	40	1	Control	-1.39076	1.05841	0.3499	0	0.335168	1	0	0
1	40	2	Control	-1.39886	1.0639	0.472025	0	0.332306	1	0	0

## Sheet: AVGs zeros omitted
TREATMENT	Formic	Acetic	Propionic	Iso-butyric	Butyric	2-Ethylbutyric	Lactic	Succinic
Control	0.682291	1.05973	0.438514			1
Control	0.682188	1.05984	0.431092			1
Control		1.79043	0.49998		0.394549	1
Control		1.78042	0.494288		0.395428	1
Control		0.994835	0.360046			1
Control		0.997672	0.361213			1
Control		0.916395	0.384973			1		1.31733
Control		0.928665	0.383692		0.286715	1
Control		0.882761	0.384878	0.290026	0.268341	1	1.46957
Control		0.875507	0.35284	0.249261	0.254116	1
Control		1.7842	0.452847		0.543546	1		1.6104
Control			0.109724
Control		0.797299				1
Control		0.810901				1
Control		1.54769	0.385502		0.416192	1		0.962618
Control		1.55639	0.383605		0.417801	1		0.852144
Control		0.971939	0.39132			1
Control		1.21862	0.374782		0.424643	1
Control		1.25627	0.375149		0.423492	1
Control		1.3443	0.337349		0.395969	1
Control		1.34915	0.340498		0.398616	1
Control		1.31653	0.38546		0.34871	1
Control		1.33152	0.388177		0.349179	1
Control		1.79453	0.463627		0.481285	1		0.808519
Control		1.77518	0.464174		0.482199	1		0.844542
Control		1.26341	0.449494		0.38114	1
Control		1.26741	0.407482		0.384219	1
Control		1.05841	0.3499		0.335168	1
Control		1.0639	0.472025		0.332306	1
AVG	0.68224	1.24264	0.393431	0.269643	0.385681	1	1.46957	1.06593
STDEV	7.31174e-05	0.326632	0.0737105	0.0288254	0.0717191	0	0	0.325976
SEM	5.17018e-05	0.0617277	0.0141856	0.0203827	0.0160369	0	0	0.133079
Honey	2.63949	1.53554			0.440079	1
Honey	2.57478	1.54162			0.441937	1
Honey	0.101133	1.20582	0.384397		0.302504	1
Honey	0.0528452	1.22682	0.387099		0.304411	1
Honey	0.17491	1.39657	0.356828			1
Honey	0.13889	1.38259	0.430459		0.314855	1
Honey	1.10988	1.29656	0.462557		0.32541	1
Honey	1.0824	1.29925	0.539339		0.328481	1
Honey			0.109724
Honey			0.109724
Honey	0.039652	1.5758	0.420706		0.347427	1
Honey		1.56394	0.428115		0.34285	1
Honey		1.36041	0.463857	0.251399	0.36292	1
Honey		1.26166	0.382		0.366694	1
Honey		1.25127	0.37834		0.368032	1
Honey		2.01232	0.369715		0.4798	1
Honey		2.01643	0.371898		0.479725	1		0.541902
Honey		0.735922	0.399527	0.299158	0.285613	1	1.34508
Honey			0.109724
Honey		1.00623	0.339152		0.319137	1
Honey		0.985235	0.333386		0.320199	1
Honey		0.950901	0.343333		0.299206	1		0.656941
Honey		0.941477	0.348402		0.303749	1
Honey		1.19752	0.366395		0.42702	1
Honey		1.19773	0.364841		0.422805	1
Honey		0.88326	0.330825			1
Honey		0.864905	0.3403			1
Honey		1.25176	0.430142		0.367007	1		0.969546
Honey		1.24038	0.426317		0.369444	1
Honey		0.474434				1		1.05249
Honey		1.3471	0.38695		0.434582	1
Honey		1.34804	0.385732		0.42991	1
Honey		1.42163	0.391369		0.380679	1
Honey		1.38222	0.397313		0.384186	1
Honey	0.228405	1.56715	0.660112		0.430263	1
Honey	0.221484	1.53533	0.627539		0.432987	1
Honey		0.922038	0.332675			1
Honey		0.920926	0.32382		0.294069	1
AVG	0.16318	1.23022	0.377222	0.275278	0.376013	1	1.34508	0.80522
STDEV	0.107035	0.356649	0.108584	0.0337711	0.057861	0	0	0.244587
SEM	0.0322721	0.0602847	0.018354	0.0238798	0.0105639	0	0	0.122294

## Sheet: AVGs incl zeros
TREATMENT	Formic	Acetic	Propionic	Iso-butyric	Butyric	2-Ethylbutyric	Lactic	Succinic
Control	0.682291	1.05973	0.438514	0	0	1	0	0
Control	0.682188	1.05984	0.431092	0	0	1	0	0
Control	0	1.79043	0.49998	0	0.394549	1	0	0
Control	0	1.78042	0.494288	0	0.395428	1	0	0
Control	0	0.994835	0.360046	0	0	1	0	0
Control	0	0.997672	0.361213	0	0	1	0	0
Control	0	0.916395	0.384973	0	0	1	0	1.31733
Control	0	0.928665	0.383692	0	0.286715	1	0	0
Control	0	0.882761	0.384878	0.290026	0.268341	1	1.46957	0
Control	0	0.875507	0.35284	0.249261	0.254116	1	0	0
Control	0	1.7842	0.452847	0	0.543546	1	0	1.6104
Control	0	0	0.109724	0	0		0	0
Control	0	0.797299	0	0	0	1	0	0
Control	0	0.810901	0	0	0	1	0	0
Control	0	1.54769	0.385502	0	0.416192	1	0	0.962618
Control	0	1.55639	0.383605	0	0.417801	1	0	0.852144
Control	0	0.971939	0.39132	0	0	1	0	0
Control	0	1.21862	0.374782	0	0.424643	1	0	0
Control	0	1.25627	0.375149	0	0.423492	1	0	0
Control	0	1.3443	0.337349	0	0.395969	1	0	0
Control	0	1.34915	0.340498	0	0.398616	1	0	0
Control	0	1.31653	0.38546	0	0.34871	1	0	0
Control	0	1.33152	0.388177	0	0.349179	1	0	0
Control	0	1.79453	0.463627	0	0.481285	1	0	0.808519
Control	0	1.77518	0.464174	0	0.482199	1	0	0.844542
Control	0	1.26341	0.449494	0	0.38114	1	0	0			Factor of 10 correction to original conc caecum
Control	0	1.26741	0.407482	0	0.384219	1	0	0
Control	0	1.05841	0.3499	0	0.335168	1	0	0
Control	0	1.0639	0.472025	0	0.332306	1	0	0			Formic	Acetic	Propionic	Iso-butyric	Butyric	2-Ethylbutyric	Lactic	Succinic	total
AVG	0.047051	1.19979	0.366298	0.0185961	0.265987	1	0.0506748	0.220536	3.16893		0.47051	11.9979	3.66298	0.185961	2.65987	10	0.506748	2.20536	31.6893
STDEV	0.175936	0.395127	0.12385	0.0697489	0.190956	0	0	0.460513	1.41613		1.75936	3.95127	1.2385	0.697489	1.90956	0	0	4.60513	14.1613
SEM	0.0326706	0.0733732	0.0229984	0.012952	0.0354597	0	0	0.0855152	0.262969		0.326706	0.733732	0.229984	0.12952	0.354597	0	0	0.855152	2.62969
											0	0	0	0	0	0	0	0	0
Honey	2.63949	1.53554	0	0	0.440079	1	0	0
Honey	2.57478	1.54162	0	0	0.441937	1	0	0
Honey	0.101133	1.20582	0.384397	0	0.302504	1	0	0
Honey	0.0528452	1.22682	0.387099	0	0.304411	1	0	0
Honey	0.17491	1.39657	0.356828	0	0	1	0	0
Honey	0.13889	1.38259	0.430459	0	0.314855	1	0	0
Honey	1.10988	1.29656	0.462557	0	0.32541	1	0	0
Honey	1.0824	1.29925	0.539339	0	0.328481	1	0	0
Honey	0	0	0.109724	0	0		0	0
Honey	0		0.109724	0	0		0	0
Honey	0.039652	1.5758	0.420706	0	0.347427	1	0	0
Honey	0	1.56394	0.428115	0	0.34285	1	0	0
Honey	0	1.36041	0.463857	0.251399	0.36292	1	0	0
Honey	0	1.26166	0.382	0	0.366694	1	0	0
Honey	0	1.25127	0.37834	0	0.368032	1	0	0
Honey	0	2.01232	0.369715	0	0.4798	1	0	0
Honey	0	2.01643	0.371898	0	0.479725	1	0	0.541902
Honey	0	0.735922	0.399527	0.299158	0.285613	1	1.34508	0
Honey	0	0	0.109724	0	0		0	0
Honey	0	1.00623	0.339152	0	0.319137	1	0	0
Honey	0	0.985235	0.333386	0	0.320199	1	0	0
Honey	0	0.950901	0.343333	0	0.299206	1	0	0.656941
Honey	0	0.941477	0.348402	0	0.303749	1	0	0
Honey	0	1.19752	0.366395	0	0.42702	1	0	0
Honey	0	1.19773	0.364841	0	0.422805	1	0	0
Honey	0	0.88326	0.330825	0	0	1	0	0
Honey	0	0.864905	0.3403	0	0	1	0	0
Honey	0	1.25176	0.430142	0	0.367007	1	0	0.969546
Honey	0	1.24038	0.426317	0	0.369444	1	0	0
Honey	0	0.474434	0	0	0	1	0	1.05249
Honey	0	1.3471	0.38695	0	0.434582	1	0	0
Honey	0	1.34804	0.385732	0	0.42991	1	0	0
Honey	0	1.42163	0.391369	0	0.380679	1	0	0
Honey	0	1.38222	0.397313	0	0.384186	1	0	0
Honey	0.228405	1.56715	0.660112	0	0.430263	1	0	0
Honey	0.221484	1.53533	0.627539	0	0.432987	1	0	0
Honey	0	0.922038	0.332675	0	0	1	0	0
Honey	0	0.920926	0.32382	0	0.294069	1	0	0			Formic	Acetic	Propionic	Iso-butyric	Butyric	2-Ethylbutyric	Lactic	Succinic	total
AVG	0.0168807	1.18629	0.364214	0.0189847	0.298217	1	0.0463822	0.111065	3.04203		0.168807	11.8629	3.64214	0.189847	2.98217	10	0.463822	1.11065	30.4203
STDEV	0.0581047	0.420166	0.127578	0.0712753	0.163276	0	0	0.293699	1.1341		0.581047	4.20166	1.27578	0.712753	1.63276	0	0	2.93699	11.341
SEM	0.00942583	0.0681599	0.0206959	0.0115624	0.0264869	0	0	0.0476443	0.183975		0.0942583	0.681599	0.206959	0.115624	0.264869	0	0	0.476443	1.83975

## Sheet: Sheet1
							30	38
StdDev of Conc (umol/g)	TREATMENT					Average of Conc (umol/g)	TREATMENT
SCFA	Control	Honey	Grand Total			SCFA	Control	Honey
Acetate	4.45785	4.62481	4.51811			Acetate	11.598	11.6055
Butyrate	1.93818	1.61559	1.76019			Butyrate	2.5712	2.92263
Formate	1.7309	6.22215	4.84146			Formate	0.454826	2.20102	x
iso-Butyrate	0.686198	0.625408	0.648161			iso-Butyrate	0.179762	0.144883
Lactate	2.68305	2.18201	2.39788			Lactate	0.489856	0.35397
Propionate	1.38861	1.60177	1.50162			Propionate	3.54088	3.42452
Succinate	4.54292	2.59937	3.6162			Succinate	2.13185	0.8476	x
Grand Total	4.65334	4.93424	4.80749			Grand Total	20.9664	21.5001
						StdDev of Conc (umol/g)	TREATMENT
						SCFA	Control	Honey
						Acetate	4.45785	4.62481
						Butyrate	1.93818	1.61559
						Formate	1.7309	6.22215
						iso-Butyrate	0.686198	0.625408
						Lactate	2.68305	2.18201
						Propionate	1.38861	1.60177
						Succinate	4.54292	2.59937
						Grand Total	4.65334	4.93424
						SEM of Conc (umol/g)	TREATMENT
						SCFA	Control	Honey
						Acetate	0.813889	0.750243
						Butyrate	0.353861	0.262083
						Formate	0.316017	1.00937
						iso-Butyrate	0.125282	0.101455
						Lactate	0.489856	0.35397
						Propionate	0.253525	0.259841
						Succinate	0.829419	0.421673

## Sheet: Sheet6
ANIMAL	Replicate	TREATMENT	SCFA	Conc (umol/g)	Tables of means
1	1	Honey	Formate	26.3949
1	2	Honey	Formate	25.7478	Grand mean 3.0378
7	1	Honey	Formate	1.01133
7	2	Honey	Formate	0.528452
8	1	Honey	Formate	1.7491	Table of means for TREATMENT
8	2	Honey	Formate	1.3889
9	1	Control	Formate	6.82291		TREATMENT	Control	Honey
9	2	Control	Formate	6.82188		mean	2.9952	3.0714
10	1	Honey	Formate	11.0988		rep.	210	266
10	2	Honey	Formate	10.824
12	1	Honey	Formate	0.39652		Minimum least significant difference	0.5665
12	2	Honey	Formate	0		Average least significant difference	0.5665
13	1	Honey	Formate	0		Maximum least significant difference	0.5665
13	2	Honey	Formate	0
14	1	Honey	Formate	0
14	2	Honey	Formate	0	Table of means for SCFA
15	1	Control	Formate	0
15	2	Control	Formate	0
16	1	Control	Formate	0		SCFA	Acetate	Butyrate	Formate	iso-Butyrate	Lactate
16	2	Control	Formate	0			11.6022	2.7676	1.4306	0.1603	0.4139
17	1	Honey	Formate	0
17	2	Honey	Formate	0
18	1	Honey	Formate	0		SCFA	Propionate	Succinate
18	2	Honey	Formate	0			3.4759	1.4142
19	1	Control	Formate	0
19	2	Control	Formate	0
20	1	Honey	Formate	0	Replication 68
20	2	Honey	Formate	0
21	1	Honey	Formate	0	Least significant difference (at 5.0%) 1.052
21	2	Honey	Formate	0
22	1	Honey	Formate	0
22	2	Honey	Formate	0	Table of means for TREATMENT.SCFA
23	1	Honey	Formate	0
23	2	Honey	Formate	0		SCFA	Acetate		Butyrate		Formate		iso-Butyrate		Lactate		Propionate		Succinate
24	1	Control	Formate	0			mean	rep.	mean	rep.	mean	rep.	mean	rep.	mean	rep.	mean	rep.	mean	rep.
24	2	Control	Formate	0		TREATMENT
25	1	Control	Formate	0		Control	11.598	30	2.5712	30	0.4548	30	0.1798	30	0.4899	30	3.5409	30	2.1319	30
25	2	Control	Formate	0		Honey	11.6055	38	2.9226	38	2.201	38	0.1449	38	0.354	38	3.4245	38	0.8476	38
26	1	Honey	Formate	0
26	2	Honey	Formate	0
27	1	Control	Formate	0		Minimum least significant difference	1.408
27	2	Control	Formate	0		Average least significant difference	1.497
28	1	Control	Formate	0		Maximum least significant difference	1.584
28	2	Control	Formate	0
29	1	Control	Formate	0
29	2	Control	Formate	0
30	1	Honey	Formate	0
30	2	Honey	Formate	0
31	1	Honey	Formate	0
31	2	Honey	Formate	0
32	1	Honey	Formate	0
32	2	Honey	Formate	0
33	1	Control	Formate	0
33	2	Control	Formate	0
34	1	Control	Formate	0
34	2	Control	Formate	0
35	1	Control	Formate	0
35	2	Control	Formate	0
36	1	Control	Formate	0
36	2	Control	Formate	0
37	1	Control	Formate	0
37	2	Control	Formate	0
38	1	Honey	Formate	2.28405
38	2	Honey	Formate	2.21484
39	1	Honey	Formate	0
39	2	Honey	Formate	0
40	1	Control	Formate	0
40	2	Control	Formate	0
1	1	Honey	Acetate	15.3554
1	2	Honey	Acetate	15.4162
7	1	Honey	Acetate	12.0582
7	2	Honey	Acetate	12.2682
8	1	Honey	Acetate	13.9657
8	2	Honey	Acetate	13.8259
9	1	Control	Acetate	10.5973
9	2	Control	Acetate	10.5984
10	1	Honey	Acetate	12.9656
10	2	Honey	Acetate	12.9925
12	1	Honey	Acetate	15.758
12	2	Honey	Acetate	15.6394
13	1	Honey	Acetate	13.6041
13	2	Honey	Acetate	0
14	1	Honey	Acetate	12.6166
14	2	Honey	Acetate	12.5127
15	1	Control	Acetate	17.9043
15	2	Control	Acetate	17.8042
16	1	Control	Acetate	9.94835
16	2	Control	Acetate	9.97672
17	1	Honey	Acetate	20.1232
17	2	Honey	Acetate	20.1643
18	1	Honey	Acetate	7.35922
18	2	Honey	Acetate	0
19	1	Control	Acetate	9.16395
19	2	Control	Acetate	9.28665
20	1	Honey	Acetate	10.0623
20	2	Honey	Acetate	9.85235
21	1	Honey	Acetate	9.50901
21	2	Honey	Acetate	9.41477
22	1	Honey	Acetate	11.9752
22	2	Honey	Acetate	11.9773
23	1	Honey	Acetate	8.8326
23	2	Honey	Acetate	8.64905
24	1	Control	Acetate	8.82761
24	2	Control	Acetate	8.75507
25	1	Control	Acetate	17.842
25	2	Control	Acetate	0
26	1	Honey	Acetate	12.5176
26	2	Honey	Acetate	12.4038
27	1	Control	Acetate	7.97299
27	2	Control	Acetate	8.10901
28	1	Control	Acetate	15.4769
28	2	Control	Acetate	15.5639
29	1	Control	Acetate	9.71939
29	2	Control	Acetate	0
30	1	Honey	Acetate	0
30	2	Honey	Acetate	4.74434
31	1	Honey	Acetate	13.471
31	2	Honey	Acetate	13.4804
32	1	Honey	Acetate	14.2163
32	2	Honey	Acetate	13.8222
33	1	Control	Acetate	12.1862
33	2	Control	Acetate	12.5627
34	1	Control	Acetate	13.443
34	2	Control	Acetate	13.4915
35	1	Control	Acetate	13.1653
35	2	Control	Acetate	13.3152
36	1	Control	Acetate	17.9453
36	2	Control	Acetate	17.7518
37	1	Control	Acetate	12.6341
37	2	Control	Acetate	12.6741
38	1	Honey	Acetate	15.6715
38	2	Honey	Acetate	15.3533
39	1	Honey	Acetate	9.22038
39	2	Honey	Acetate	9.20926
40	1	Control	Acetate	10.5841
40	2	Control	Acetate	10.639
1	1	Honey	Propionate	0
1	2	Honey	Propionate	0
7	1	Honey	Propionate	3.84397
7	2	Honey	Propionate	3.87099
8	1	Honey	Propionate	3.56828
8	2	Honey	Propionate	4.30459
9	1	Control	Propionate	4.38514
9	2	Control	Propionate	4.31092
10	1	Honey	Propionate	4.62557
10	2	Honey	Propionate	5.39339
12	1	Honey	Propionate	4.20706
12	2	Honey	Propionate	4.28115
13	1	Honey	Propionate	4.63857
13	2	Honey	Propionate	0
14	1	Honey	Propionate	3.82
14	2	Honey	Propionate	3.7834
15	1	Control	Propionate	4.9998
15	2	Control	Propionate	4.94288
16	1	Control	Propionate	3.60046
16	2	Control	Propionate	3.61213
17	1	Honey	Propionate	3.69715
17	2	Honey	Propionate	3.71898
18	1	Honey	Propionate	3.99527
18	2	Honey	Propionate	1.09724
19	1	Control	Propionate	3.84973
19	2	Control	Propionate	3.83692
20	1	Honey	Propionate	3.39152
20	2	Honey	Propionate	3.33386
21	1	Honey	Propionate	3.43333
21	2	Honey	Propionate	3.48402
22	1	Honey	Propionate	3.66395
22	2	Honey	Propionate	3.64841
23	1	Honey	Propionate	3.30825
23	2	Honey	Propionate	3.403
24	1	Control	Propionate	3.84878
24	2	Control	Propionate	3.5284
25	1	Control	Propionate	4.52847
25	2	Control	Propionate	1.09724
26	1	Honey	Propionate	4.30142
26	2	Honey	Propionate	4.26317
27	1	Control	Propionate	0
27	2	Control	Propionate	0
28	1	Control	Propionate	3.85502
28	2	Control	Propionate	3.83605
29	1	Control	Propionate	3.9132
29	2	Control	Propionate	0
30	1	Honey	Propionate	0
30	2	Honey	Propionate	0
31	1	Honey	Propionate	3.8695
31	2	Honey	Propionate	3.85732
32	1	Honey	Propionate	3.91369
32	2	Honey	Propionate	3.97313
33	1	Control	Propionate	3.74782
33	2	Control	Propionate	3.75149
34	1	Control	Propionate	3.37349
34	2	Control	Propionate	3.40498
35	1	Control	Propionate	3.8546
35	2	Control	Propionate	3.88177
36	1	Control	Propionate	4.63627
36	2	Control	Propionate	4.64174
37	1	Control	Propionate	4.49494
37	2	Control	Propionate	4.07482
38	1	Honey	Propionate	6.60112
38	2	Honey	Propionate	6.27539
39	1	Honey	Propionate	3.32675
39	2	Honey	Propionate	3.2382
40	1	Control	Propionate	3.499
40	2	Control	Propionate	4.72025
1	1	Honey	iso-Butyrate	0
1	2	Honey	iso-Butyrate	0
7	1	Honey	iso-Butyrate	0
7	2	Honey	iso-Butyrate	0
8	1	Honey	iso-Butyrate	0
8	2	Honey	iso-Butyrate	0
9	1	Control	iso-Butyrate	0
9	2	Control	iso-Butyrate	0
10	1	Honey	iso-Butyrate	0
10	2	Honey	iso-Butyrate	0
12	1	Honey	iso-Butyrate	0
12	2	Honey	iso-Butyrate	0
13	1	Honey	iso-Butyrate	2.51399
13	2	Honey	iso-Butyrate	0
14	1	Honey	iso-Butyrate	0
14	2	Honey	iso-Butyrate	0
15	1	Control	iso-Butyrate	0
15	2	Control	iso-Butyrate	0
16	1	Control	iso-Butyrate	0
16	2	Control	iso-Butyrate	0
17	1	Honey	iso-Butyrate	0
17	2	Honey	iso-Butyrate	0
18	1	Honey	iso-Butyrate	2.99158
18	2	Honey	iso-Butyrate	0
19	1	Control	iso-Butyrate	0
19	2	Control	iso-Butyrate	0
20	1	Honey	iso-Butyrate	0
20	2	Honey	iso-Butyrate	0
21	1	Honey	iso-Butyrate	0
21	2	Honey	iso-Butyrate	0
22	1	Honey	iso-Butyrate	0
22	2	Honey	iso-Butyrate	0
23	1	Honey	iso-Butyrate	0
23	2	Honey	iso-Butyrate	0
24	1	Control	iso-Butyrate	2.90026
24	2	Control	iso-Butyrate	2.49261
25	1	Control	iso-Butyrate	0
25	2	Control	iso-Butyrate	0
26	1	Honey	iso-Butyrate	0
26	2	Honey	iso-Butyrate	0
27	1	Control	iso-Butyrate	0
27	2	Control	iso-Butyrate	0
28	1	Control	iso-Butyrate	0
28	2	Control	iso-Butyrate	0
29	1	Control	iso-Butyrate	0
29	2	Control	iso-Butyrate	0
30	1	Honey	iso-Butyrate	0
30	2	Honey	iso-Butyrate	0
31	1	Honey	iso-Butyrate	0
31	2	Honey	iso-Butyrate	0
32	1	Honey	iso-Butyrate	0
32	2	Honey	iso-Butyrate	0
33	1	Control	iso-Butyrate	0
33	2	Control	iso-Butyrate	0
34	1	Control	iso-Butyrate	0
34	2	Control	iso-Butyrate	0
35	1	Control	iso-Butyrate	0
35	2	Control	iso-Butyrate	0
36	1	Control	iso-Butyrate	0
36	2	Control	iso-Butyrate	0
37	1	Control	iso-Butyrate	0
37	2	Control	iso-Butyrate	0
38	1	Honey	iso-Butyrate	0
38	2	Honey	iso-Butyrate	0
39	1	Honey	iso-Butyrate	0
39	2	Honey	iso-Butyrate	0
40	1	Control	iso-Butyrate	0
40	2	Control	iso-Butyrate	0
1	1	Honey	Butyrate	4.40079
1	2	Honey	Butyrate	4.41937
7	1	Honey	Butyrate	3.02504
7	2	Honey	Butyrate	3.04411
8	1	Honey	Butyrate	0
8	2	Honey	Butyrate	3.14855
9	1	Control	Butyrate	0
9	2	Control	Butyrate	0
10	1	Honey	Butyrate	3.2541
10	2	Honey	Butyrate	3.28481
12	1	Honey	Butyrate	3.47427
12	2	Honey	Butyrate	3.4285
13	1	Honey	Butyrate	3.6292
13	2	Honey	Butyrate	0
14	1	Honey	Butyrate	3.66694
14	2	Honey	Butyrate	3.68032
15	1	Control	Butyrate	3.94549
15	2	Control	Butyrate	3.95428
16	1	Control	Butyrate	0
16	2	Control	Butyrate	0
17	1	Honey	Butyrate	4.798
17	2	Honey	Butyrate	4.79725
18	1	Honey	Butyrate	2.85613
18	2	Honey	Butyrate	0
19	1	Control	Butyrate	0
19	2	Control	Butyrate	2.86715
20	1	Honey	Butyrate	3.19137
20	2	Honey	Butyrate	3.20199
21	1	Honey	Butyrate	2.99206
21	2	Honey	Butyrate	3.03749
22	1	Honey	Butyrate	4.2702
22	2	Honey	Butyrate	4.22805
23	1	Honey	Butyrate	0
23	2	Honey	Butyrate	0
24	1	Control	Butyrate	2.68341
24	2	Control	Butyrate	2.54116
25	1	Control	Butyrate	5.43546
25	2	Control	Butyrate	0
26	1	Honey	Butyrate	3.67007
26	2	Honey	Butyrate	3.69444
27	1	Control	Butyrate	0
27	2	Control	Butyrate	0
28	1	Control	Butyrate	4.16192
28	2	Control	Butyrate	4.17801
29	1	Control	Butyrate	0
29	2	Control	Butyrate	0
30	1	Honey	Butyrate	0
30	2	Honey	Butyrate	0
31	1	Honey	Butyrate	4.34582
31	2	Honey	Butyrate	4.2991
32	1	Honey	Butyrate	3.80679
32	2	Honey	Butyrate	3.84186
33	1	Control	Butyrate	4.24643
33	2	Control	Butyrate	4.23492
34	1	Control	Butyrate	3.95969
34	2	Control	Butyrate	3.98616
35	1	Control	Butyrate	3.4871
35	2	Control	Butyrate	3.49179
36	1	Control	Butyrate	4.81285
36	2	Control	Butyrate	4.82199
37	1	Control	Butyrate	3.8114
37	2	Control	Butyrate	3.84219
38	1	Honey	Butyrate	4.30263
38	2	Honey	Butyrate	4.32987
39	1	Honey	Butyrate	0
39	2	Honey	Butyrate	2.94069
40	1	Control	Butyrate	3.35168
40	2	Control	Butyrate	3.32306
1	1	Honey	Lactate	0
1	2	Honey	Lactate	0
7	1	Honey	Lactate	0
7	2	Honey	Lactate	0
8	1	Honey	Lactate	0
8	2	Honey	Lactate	0
9	1	Control	Lactate	0
9	2	Control	Lactate	0
10	1	Honey	Lactate	0
10	2	Honey	Lactate	0
12	1	Honey	Lactate	0
12	2	Honey	Lactate	0
13	1	Honey	Lactate	0
13	2	Honey	Lactate	0
14	1	Honey	Lactate	0
14	2	Honey	Lactate	0
15	1	Control	Lactate	0
15	2	Control	Lactate	0
16	1	Control	Lactate	0
16	2	Control	Lactate	0
17	1	Honey	Lactate	0
17	2	Honey	Lactate	0
18	1	Honey	Lactate	13.4508
18	2	Honey	Lactate	0
19	1	Control	Lactate	0
19	2	Control	Lactate	0
20	1	Honey	Lactate	0
20	2	Honey	Lactate	0
21	1	Honey	Lactate	0
21	2	Honey	Lactate	0
22	1	Honey	Lactate	0
22	2	Honey	Lactate	0
23	1	Honey	Lactate	0
23	2	Honey	Lactate	0
24	1	Control	Lactate	14.6957
24	2	Control	Lactate	0
25	1	Control	Lactate	0
25	2	Control	Lactate	0
26	1	Honey	Lactate	0
26	2	Honey	Lactate	0
27	1	Control	Lactate	0
27	2	Control	Lactate	0
28	1	Control	Lactate	0
28	2	Control	Lactate	0
29	1	Control	Lactate	0
29	2	Control	Lactate	0
30	1	Honey	Lactate	0
30	2	Honey	Lactate	0
31	1	Honey	Lactate	0
31	2	Honey	Lactate	0
32	1	Honey	Lactate	0
32	2	Honey	Lactate	0
33	1	Control	Lactate	0
33	2	Control	Lactate	0
34	1	Control	Lactate	0
34	2	Control	Lactate	0
35	1	Control	Lactate	0
35	2	Control	Lactate	0
36	1	Control	Lactate	0
36	2	Control	Lactate	0
37	1	Control	Lactate	0
37	2	Control	Lactate	0
38	1	Honey	Lactate	0
38	2	Honey	Lactate	0
39	1	Honey	Lactate	0
39	2	Honey	Lactate	0
40	1	Control	Lactate	0
40	2	Control	Lactate	0
1	1	Honey	Succinate	0
1	2	Honey	Succinate	0
7	1	Honey	Succinate	0
7	2	Honey	Succinate	0
8	1	Honey	Succinate	0
8	2	Honey	Succinate	0
9	1	Control	Succinate	0
9	2	Control	Succinate	0
10	1	Honey	Succinate	0
10	2	Honey	Succinate	0
12	1	Honey	Succinate	0
12	2	Honey	Succinate	0
13	1	Honey	Succinate	0
13	2	Honey	Succinate	0
14	1	Honey	Succinate	0
14	2	Honey	Succinate	0
15	1	Control	Succinate	0
15	2	Control	Succinate	0
16	1	Control	Succinate	0
16	2	Control	Succinate	0
17	1	Honey	Succinate	0
17	2	Honey	Succinate	5.41902
18	1	Honey	Succinate	0
18	2	Honey	Succinate	0
19	1	Control	Succinate	13.1733
19	2	Control	Succinate	0
20	1	Honey	Succinate	0
20	2	Honey	Succinate	0
21	1	Honey	Succinate	6.56941
21	2	Honey	Succinate	0
22	1	Honey	Succinate	0
22	2	Honey	Succinate	0
23	1	Honey	Succinate	0
23	2	Honey	Succinate	0
24	1	Control	Succinate	0
24	2	Control	Succinate	0
25	1	Control	Succinate	16.104
25	2	Control	Succinate	0
26	1	Honey	Succinate	9.69546
26	2	Honey	Succinate	0
27	1	Control	Succinate	0
27	2	Control	Succinate	0
28	1	Control	Succinate	9.62618
28	2	Control	Succinate	8.52144
29	1	Control	Succinate	0
29	2	Control	Succinate	0
30	1	Honey	Succinate	0
30	2	Honey	Succinate	10.5249
31	1	Honey	Succinate	0
31	2	Honey	Succinate	0
32	1	Honey	Succinate	0
32	2	Honey	Succinate	0
33	1	Control	Succinate	0
33	2	Control	Succinate	0
34	1	Control	Succinate	0
34	2	Control	Succinate	0
35	1	Control	Succinate	0
35	2	Control	Succinate	0
36	1	Control	Succinate	8.08519
36	2	Control	Succinate	8.44542
37	1	Control	Succinate	0
37	2	Control	Succinate	0
38	1	Honey	Succinate	0
38	2	Honey	Succinate	0
39	1	Honey	Succinate	0
39	2	Honey	Succinate	0
40	1	Control	Succinate	0
40	2	Control	Succinate	0
